# The Cellular Expression and Genetics of Purple Body (*Pb*) in the Ocular Media of the Guppy *Poecilia reticulata*

Alan S. Bias<sup>1</sup> and Richard D. Squire<sup>2</sup>

<sup>1</sup>Independent Researcher and Swordtail Guppy Breeder. Mailing address: P.O. Box 1508, Lewisburg, West Virginia 24901, USA. [orcid.org/0000-0002-9093-619X](http://orcid.org/0000-0002-9093-619X). [alansbias@aol.com](mailto:alansbias@aol.com)

<sup>2</sup>Biology Department (retired), University of Puerto Rico, Mayaguez campus, Mayaguez, Puerto Rico, USA. Mailing address: P. O. Box 3227, Mayaguez, P.R., USA 00681-3227. [orcid.org/0000-0002-3916-0672](http://orcid.org/0000-0002-3916-0672). [rickdsquire@gmail.com](mailto:ricksquire@gmail.com)

**Abstract.** Our study revealed the presence of all major classes of chromatophores (melanophores, xanthophores, erythrophores, violet-blue iridophores, xantho-erythrophores) and crystalline platelets in various combinations in the iris and ocular media (cornea, aqueous humor, vitreous humor, outer lens membrane) of *Poecilia reticulata*. This novel ocular media study of *P. reticulata* takes into account the distinct interactions of Purple Body (*Pb*) based on results of previous Bias and Squire Purple Body (*Pb*) publications. Taken in conjunction with other researcher's published results (regarding UV reflected color and pattern, vision, mate choice, individual preferences, and opsin capabilities) this indicates that these ocular chromatophore populations together create a complex ocular filter mechanism. This mechanism in turn provides spectral capabilities into the UV and Near-UV wavelengths in both *Pb* and non-*Pb* individuals. The chromatophores in the cornea, aqueous humor, covering membranes of the lens, and the vitreous humor comprise an ocular filter system that could reduce UV damage to the internal structures of the eye. The guppy's ability to use UVA as a visual component provides a "private signally system" that cannot be detected by some predators. While non-*Pb* guppies should derive benefit in the near-UV from violet-blue iridophore units, greater benefit will be derived by *Pb* individuals with more violet iridophores functioning in the lower UV and near-UV wavelengths. To our knowledge little has been published for *P. reticulata* concerning pigmentation within the guppy eye. Macroscopic and microscopic imagery is presented.

**Key Words:** ocular media filter, ocular chromatophores, aqueous humor chromatophores, vitreous humor chromatophores, yellow color pigment, violet iridophore, blue iridophore, violet-blue iridophore, xanthophore, xantho-erythrophore, Purple Guppy, Purple Body, Purple Body gene.

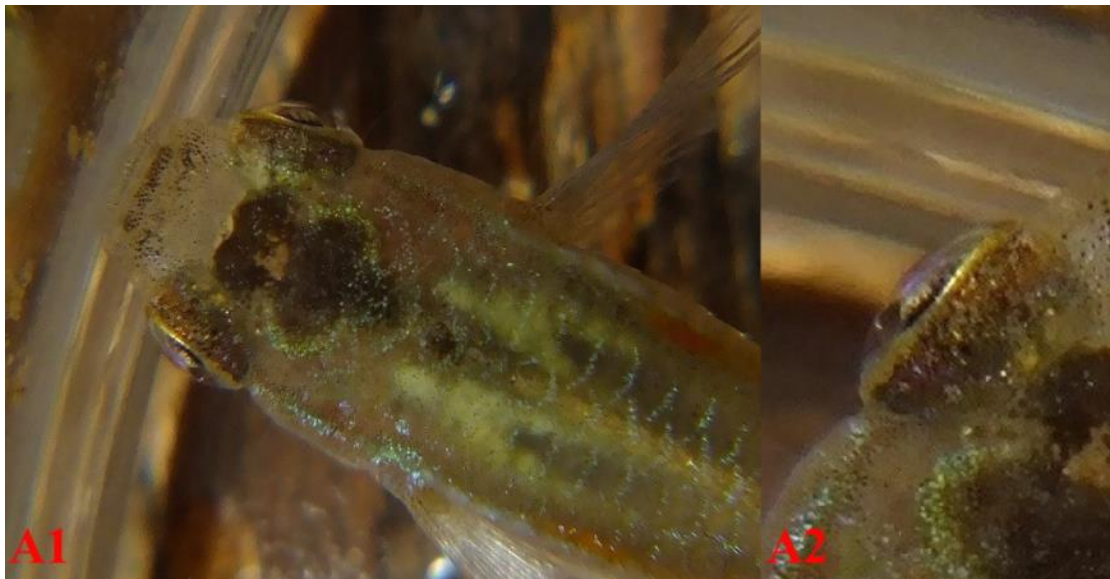

**Fig 1. (A1)** Jemez feral male *Pb*/-. **(A2)** Same field enlarged, high angle. Notice the protruding lens (PL) is reflecting "violet" from the iris in the central area of the pupil.

## 37 Introduction

38 The intent of this paper is multifold: 1. To identify phenotypic and microscopic  
39 characteristics of the newly described Purple Body trait in ocular media. 2. To provide  
40 photographic and microscopic exhibits of Purple Body and non-Purple Body eyes for ease in  
41 identification of chromatophore types (**Fig 2**) and their interactions in the ocular media. 3.  
42 To encourage future study interest at a cellular level of populations in which Purple Body  
43 highlights UV (Ultra-Violet) and near-UV reflective qualities are found. 4. To stimulate  
44 molecular level studies of Purple Body and to identify the linkage group (LG) to which it  
45 belongs.

46

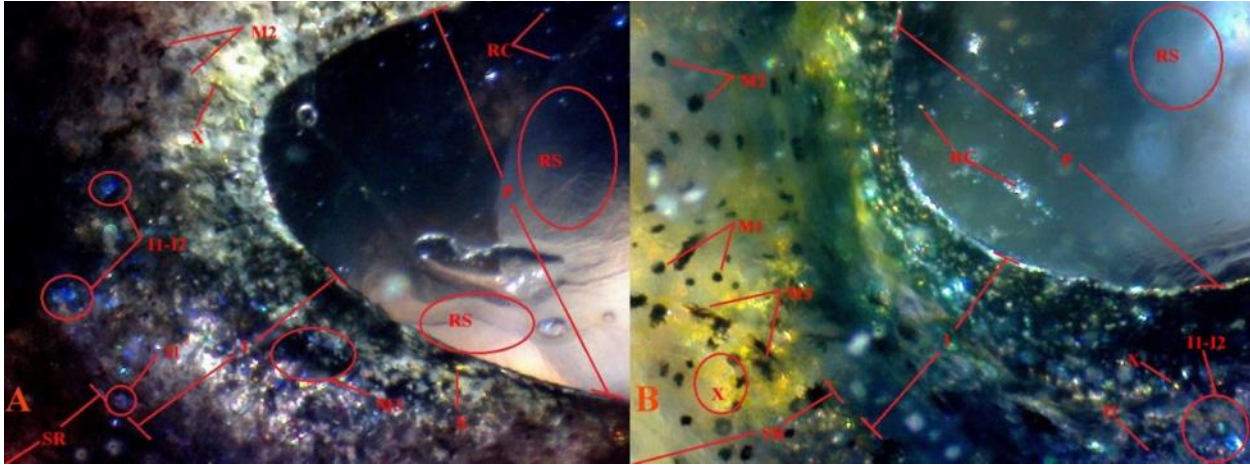

47

48 **Fig 2. Pigment cell types and structures identified, (A)** 17 Pb 40X 16 *Pb/pb* (*non-*  
49 *dissected pupil; iris and lens*) reflected light. **(B)** 22 non-Pb 40X 5 *pb/pb* (*dissected pupil;*  
50 *iris and lens*) reflected light. Melanophores punctate (M1), melanophores corolla (M2),  
51 melanophores dendritic (M3); to include visible dendritic melanophore strings and  
52 violet/blue iridophore chromatophore units. Violet iridophores (I1), blue iridophores (I2); to  
53 include violet-blue iridophore collections. Xanthophores (X); comprised of isolated single  
54 cells and small clustered groups (dendritic structures). Iris (I). Pupil (P). Scleral ring (SR).  
55 Reflected Chromatophore sheen from iris (RS). Reflected single cells from iris (RC).  
56

57

58 Teleost species, including the Guppy, possess a complex eye with the ability to detect  
59 color and shape. Like many prey species, positioning of the eye is set for maximum field of  
60 view. Most species are considered to have fixed shape with adjustments made by changes  
61 in the amount of pupil protrusion; i.e. distance above the plane of the body. Variation in  
62 colors and color characteristics such as hue, depth, etc. cannot be important in female-  
63 based sexual selection unless the female, and male, can detect these color characteristics.  
64 Therefore, the evolution of color characteristics must be accompanied by the evolution of  
65 the ability to detect these colors. Endler showed that selection for spectral sensitivity  
66 variation in both short-wavelength sensitivity (*SWS*) and long wave sensitivity (*LWS*) is due  
67 to a heritable factor in guppies (Endler 2001).

68

69 To our knowledge little has been published for *P. reticulata* concerning pigmentation  
70 within the guppy eye (Kunz 1977). Recent study indicates color vision varies across  
71 populations, and that populations with stronger preferences for orange had higher *LWS*  
72 opsin levels (Sandkam 2015a and 2015b). It has been shown that Guppies are able to  
73 perceive UV wavelengths, and that males reflect UV from both structural color and color  
74 pigment with variability between individuals. It was further shown that female association  
75 preference with males occurs under long wavelength (*UV-A*) conditions in which orange is  
76 visible (White 2003). While this study suggested that females have little or no sexual

75 selective preference for either low UV or high UV males, it did not specifically focus on any  
76 benefit derived from reflective qualities of Pb under reduced ambient lighting conditions.

77 Early studies re-affirmed that courtship activity was at its highest during dawn and dusk.  
78 These are periods during which SWS and LWS are visible from low angle ambient sunlight  
79 (Endler 1987, 1991, 1992; Loew 1990). Others confirm the presence of UV-sensitive retinal  
80 cones, UV-transmittable ocular media, and SWS opsin genes in guppies (Douglas 1989,  
81 1990; Archer 1987, 1990; Weadick 2007; Ward 2008; Watson 2010; Smith 2002).  
82 Individuals expressing Pb exhibit higher violet to blue iridophore density. Whether this  
83 results from an increased number of cells or simply the result of their increased visibility  
84 from the reduction of yellow xanthophores has not been determined. Existing red  
85 erythrophore populations appear unaltered (Bias and Squire, 2017a).

86 While Archer (1987) was unable to prove the existence of visual pigments extending into  
87 the accepted starting range for peak sensitivity (*maximum absorbance* -  $\lambda_{\max}$ ) in UV  
88 spectrum (*UVA 380-400nm*), he showed well marked clusters at  $\lambda_{\max}$  410nm, 465nm and  
89 573nm. He concurred with earlier studies asserting that Guppies are polymorphic for color  
90 vision in LWS, with most rhodopsin-porphyrin polymorphism in cones absorbing yellow,  
91 orange and red. Kemp in turn reported UV reflectance of violet-blue iridophores and orange  
92 spots ranging from 350-400nm (Kemp 2008). A molecular level study (Ward 2008)  
93 indicates a higher than normal duplication and divergence of 4 distinct LWS in *Poecilia*, as  
94 compared to other species. Laver (2011) conducted PCR studies that showed the presence  
95 of 11 different opsin genes in guppies originating from Cumaná, Venezuela. They found that  
96 10 different opsins are found in juveniles, and both male and female adults.

97 With the discovery of variation in opsin expression between individuals of the Guppy's  
98 eleven opsin cones, it has been suggested that new designs in behavioral study are  
99 warranted in regard to mate choice (Rennison 2011). Modification of scleral and iris pigment  
100 is noted in Pb, resulting in greatly increased levels of violet iridophores as compared to non-  
101 Pb. A similar situation is also found with modification by other traits, such as Metal Gold  
102 (*Mg*) (Bias 2015, and *unpublished breeding notes*), that produces not only proliferation of  
103 reflective yellow color pigments in the body, but also in ocular media (cornea, aqueous  
104 humor, vitreous humor, outer lens membrane).  
105

## 106 **Materials**

### 107 **ID Number, Pb or non-Pb, Color / Strain, Genotype**

108 (**See:** Supplemental S1 for Strain Genotypes and Slide Specimen Photos).  
109

110 13 Pb male (grey E) *Pb/Pb*.

111 17 Pb (grey E, litter mate – not actual male) *Pb/pb*.

112 18 Pb (grey E, related male – not actual male) *Pb/Pb*.

113 19 non-Pb (grey E, litter mate – not actual male) *pb/pb*.

114 22 non-Pb (grey) *pb/pb*.

115 23 Pb (grey) *Pb/pb*.

116 28 non-Pb (blond Ginga) *pb/pb*.

117 30 Pb [Jemez Female] (grey) *Pb/-*.

118 31 Pb [Jemez Female] (grey) *Pb/-*.

119 32 Pb [Jemez Female] (grey) *Pb/-*.

120 33 Pb [Jemez Female] (grey) *Pb/-*.

121 34 Pb [Jemez Female] (grey) *Pb/-*.  
122

## 123 **Methods**

124 All study fish were raised in 5.75, 8.75 and 10-gallon all-glass aquaria dependent upon  
125 age. They received 16 hours of light and 8 hours of darkness per day. Temperatures



126 ranged from 78°F to 82°F. Fish were fed a blend of commercially available vegetable and  
127 algae based flake foods and Ziegler Finfish Starter (50/50 mix ratio) twice daily, and newly  
128 hatched live *Artemia nauplii* twice daily. A high volume feeding schedule was maintained in  
129 an attempt to produce two positive results: 1. Reduce the time to onset of initial sexual  
130 maturity and coloration, thus reduce time between breedings. 2. Increase mature size for  
131 ease of phenotypic evaluation and related microscopic study.

132 All euthanized specimens were photographed immediately, or as soon as possible, after  
133 temperature reduction (rapid chilling) in water (H<sub>2</sub>O) at temperatures just above freezing  
134 (0°C) to avoid potential damage to tissue and chromatophores, while preserving maximum  
135 expression of motile xantho-erythrophores in Pb and non-Pb specimens. All anesthetized  
136 specimens were photographed immediately after short-term immersion in a mixture of 50%  
137 aged tank water (H<sub>2</sub>O) and 50% carbonated water (H<sub>2</sub>CO<sub>3</sub>).

138 All dried specimens were photographed immediately after rehydration in cold water  
139 (H<sub>2</sub>O). Prior euthanasia was by cold water (H<sub>2</sub>O) immersion at temperatures just above  
140 freezing (0 °C). MS-222 (Tricaine methanesulfonate) was not used to avoid the potential  
141 for reported damage and/or alterations to chromatophores, in particular melanophores,  
142 prior to slide preparation.

143

## 144 Results

### 145 I. Description and Characteristics: Pb (*Pb/Pb*) vs. non-Pb 146 (*pb/pb*)

147 Our results show chromatophore populations residing in all areas of ocular media with  
148 the possible exception of the lens itself. We postulate that dense layers of violet-blue  
149 iridophores in conjunction with melanophores and xanthophores residing within the cornea-  
150 aqueous humor-iris-vitreous humor and the surrounding capsule at the anterior pole of the  
151 crystalline lens act as “ocular media filters”, with individuals deriving benefit in the UV  
152 and/or near-UV spectrum. The existence of similar filters has been described and  
153 summarized in other teleost fish species and mammals (Douglas 1989, 1999, 2014; Siebeck  
154 2001). Pb will provide benefit at lower wavelengths with increased levels of violet  
155 iridophores, and non-Pb will have reduced benefit at slightly higher average wavelengths  
156 with balanced violet-blue iridophores. Xanthophores in turn, counter balance and provide  
157 benefit in the higher wavelengths.

158 Douglas states, “The range of wavelengths to which an animal is sensitive depends both  
159 on the spectral location of its visual pigments and on the wavelengths that impinge upon  
160 them. The latter is governed not only by the environment in which the animal lives but also  
161 by the absorption and reflection characteristics of structures within the eye. Thus, any  
162 consideration of fish colour vision must take into account the transmission of their lens and  
163 cornea” (Douglas 1989). Prior to this, ocular media was commonly considered to be “clear”  
164 for the most part in both freshwater and marine species. The exceptions were species  
165 noted with yellow corneas (see Douglas 1989 for review). Advances in conventional  
166 microscopy through the use of digital cameras and software allow us to clearly show the  
167 presence of structural and pigmented color residing in locations that earlier appeared to be  
168 clear under transmitted light.

169 Spectral color is produced by single wavelengths of ambient sunlight. The human Visible  
170 Wave Length Band (Visual Color) includes: red (620-670 nm Bright Red / 670-750 nm Dark  
171 Red), orange and yellow (570-620 nm), green (500-570 nm), blue (430-500 nm), and  
172 violet (400-430 nm). Red light, with the longest wavelength and the least amount of  
173 energy, allows natural light penetration at less depth. Blue / violet light (*near-UV*), has the  
174 shortest wavelength and the most amount of energy, and allows natural light penetration to  
175 greater depth. Violet is a true wavelength color, while Purple is a composite effect produced  
176 by combining blue and red wavelength colors. Since we as humans automatically think of

177 the visual spectrum in terms of what we ourselves can see, it is all too easy to forget that  
178 for guppies, the visual spectrum extends down into the UVA range of at least 250-400nm  
179 (see the Discussion for more details and references).

180 In general, while there are microscopic differences, our findings of visual distinctions  
181 between Pb and non-Pb are often more consistent, as opposed to microscopic distinctions.  
182 Much of this is likely the result of variability in both zygosity and ornament composition  
183 between individuals, within and between both populations and strains. Microscopically,  
184 structural differentiation between xantho-erythrophores appears minimal, with differences in  
185 the population levels and collection or clustering of xanthophores. Heterozygous Pb exhibits  
186 partial reduction in collected xanthophores, and homozygous Pb exhibits the near complete  
187 removal of collected and clustered xanthophores. Though, it is noted that yellow color cell  
188 populations consisting of isolated “wild-type” single cell xanthophores remain intact.

189

## 190 **II. Macroscopic Observations: The eye of *Poecilia*** 191 ***reticulata* in homozygous Pb *Pb/Pb*, heterozygous Pb** 192 ***Pb/pb* and non-Pb *pb/pb***

193 Our results are based on several phenotypes and multiple specimens. The cornea and  
194 pupil are circular shaped allowing for a near 360° wide angle view of their environment,  
195 with little bending of light wavelengths during transmission. Light adjustment is  
196 accomplished primarily by dorsoventral and anteroposterior adjustment of the iris. In the  
197 iris Pb exhibited an “overall” higher incidence of violet iridophores and “purple” appearance,  
198 as compared to non-Pb that express a “blue appearance with either a predominance of blue  
199 iridophores or equal ratio of violet-blue iridophores. [**Note:** hereafter referenced as  
200 *balanced to reflect a predominance of blue or equal violet-blue iridophores for ease of*  
201 *discussion*].

202 *P. reticulata* cranial structure is bilaterally symmetric when viewed from a high angle.  
203 The Left-right axis gently slopes from the dorsal base in even taper to the supraoccipital  
204 surface (see S1 for naming and locations of axial planes). Then a slight increase in taper  
205 begins and continues to the mouth (**Fig 3A-C**). Differential between males and females is  
206 minimal, though greater between individuals.

207 The dorsoventral axis is also generally bilaterally symmetric. Operculum (gill plate) is  
208 observed to consist of fused bony opercle, preopercle, interopercle and flexible subopercle.  
209 Dorsal side slopes downward starting at the dorsal base, increasingly past the supraoccipital  
210 to the upper jaw. The ventral side axis maintains a more general upward slope to the  
211 subopercle, with increasing upward angle past the interopercle through the dentary to the  
212 lower jaw (**Fig 3 and 4, D-F**). Differential between males and females is minimal, though  
213 greater between individuals and often appears more consistent among males

214 High-angle macroscopic images reveal lens protrusion well past the plane of the iris to  
215 produce a wide field of view (**Fig 3 and 4, D-F**), with a corneal size near equal to the  
216 circumference of the eye extending to the scleral ring. Eyes are deep set with high  
217 chromatophore content in bony orbits between the sagittal crest and the preopercle. The  
218 overall forward pointing of the eye-set generally follows the tapering of the left-right axis.  
219 Variability between males and females is minimal, though it often appeared greater between  
220 females and more consistent among males. Pupils express no visible aphakic gap (the  
221 “lensless” part of the pupil that does not cover the lens, Schmitz 2011) between the  
222 protruding lens and iris in perpendicular macroscopic images (**Fig 3 and 4, A-C**). This  
223 would be expected in the case of freshwater herbivore/detritivore prey species (Gagnon  
224 2016).

225

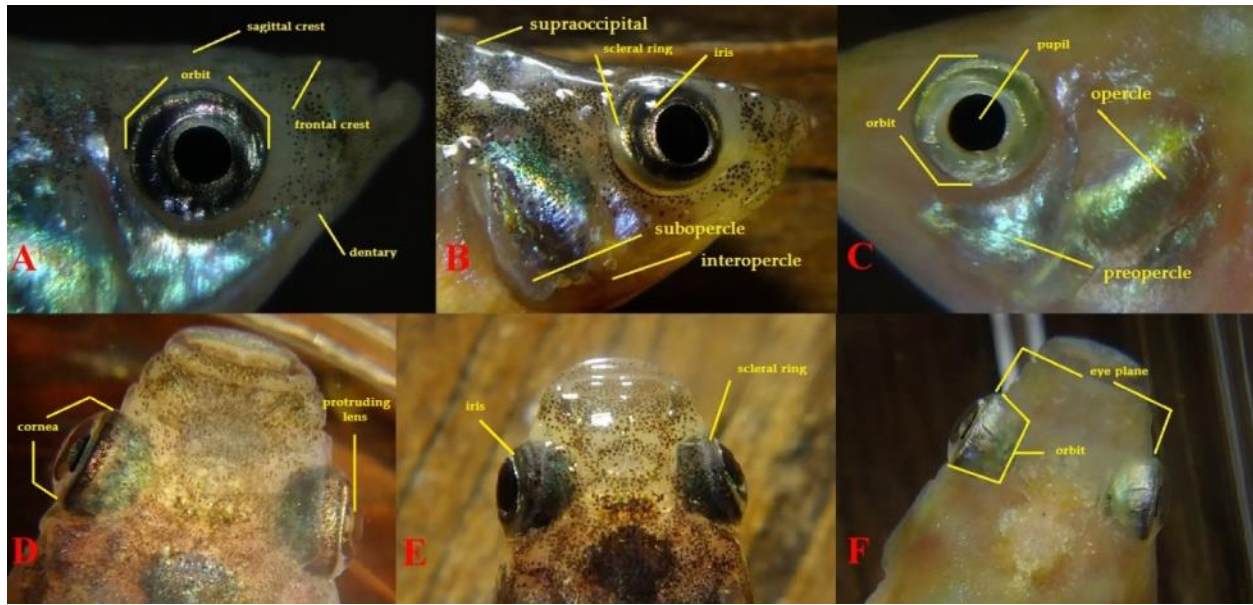

226  
227  
228  
229  
230  
231  
232

**Fig 3.** (A) Grey dark-eye dominant *Pb/Pb* female. (B) Grey Light Eye *Pb/-* female. (C) Grey Non-*Pb pb/pb* female. Chromatophores (violet-blue iridophores, melanophores and xanthophores) are visible in both the scleral ring and iris of all specimens. The cornea and underlying aqueous humor fluid appear clear to the naked eye above the proximal pupil region.

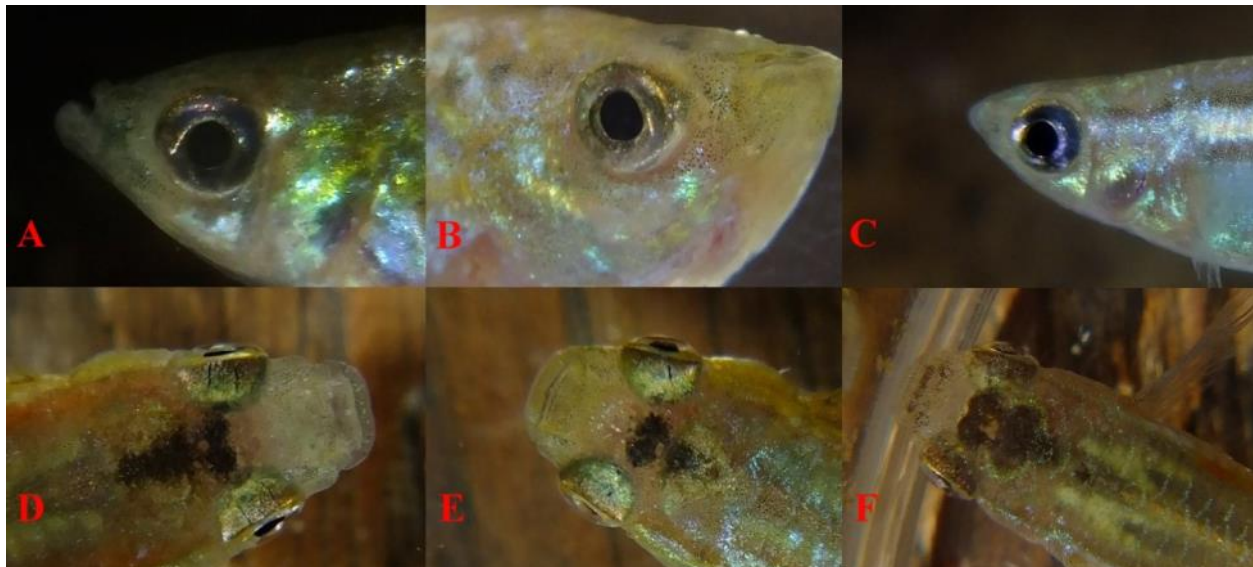

233  
234  
235  
236  
237  
238  
239  
240  
241  
242  
243  
244

**Fig 4.** (A & D) Grey *Pb/Pb* male. (B & E) Grey *Pb/-* male. (C & F) Grey Non-*Pb pb/pb* male. Chromatophores (violet-blue iridophores, melanophores and xanthophores) are visible in both the scleral ring and iris of all specimens. Cornea and underlying aqueous humor fluid appear clear to the naked eye above the proximal pupil region.

The pupillary response to ambient light changes in bony teleosts is generally considered static; i.e. non-responsive. Limited research has shown several species are capable of pupil dilation (Douglas 1998; Schmitz 2011). *Poecilia reticulata* populations and Domestic strains commonly possess two distinct eye types: “black or dark-eye” (Fig 3A-B, 4A, 4C) and “silver or light eye” (Fig 3C, 4B), based on coloration of the sclera and iris. In *P. reticulata* dark eye is often associated with dominance or aggression and the light eye are more



245 prevalent. This is in contrast to some species of cichlidae (Miyai 2011). In some *P.*  
246 *reticulata* populations and strains a portion of individuals may remain consistently dark-  
247 eyed, while in others only dominant male(s) and female(s) express dark-eyes (Gorlick  
248 1976; Martin 1981; Magurran 1991).

249 This demonstrates an ability for pupillary response in the form of dilation in *P. reticulata*,  
250 though not necessarily to changes in ambient lighting. Regardless of eye type, dense  
251 populations of epithelial violet-blue iridophores and melanophores were observed  
252 macroscopically in the iris in Pb phenotypes producing a more “purple” appearance. In  
253 contrast, non-Pb irises tended to express balanced violet-blue iridophore and equal  
254 melanophore populations in both eye types with “blue” appearance. Again, there was much  
255 variability in observations and the complete genotype and angle of observation for each  
256 individual specimen had to be considered in interpretation and understanding of the results.

257 Observations of the visual axis in the Guppy reveal the eye tilts at a downward angle  
258 (Fig 5A) and slightly forward (Fig 5B) from the tapering body structure. Other than  
259 occasional “reflex blinking” to adjust the iris and / or lens, movements that are common in  
260 teleost species without the benefit of an eyelid, the eyes are static. This reflex movement is  
261 assumed to be a mechanism for muscle relaxation and/or refocusing of the eye. Convex  
262 shape and curvature in the plane of the iris was detected in high-angle macroscopic images.

263 Visual observations, in two forms, of live specimens and photographic images indicate  
264 that lack of eye movement is somewhat compensated for by control of lens movement in  
265 angle and direction (Fernald 1988; Gagnon 2016). First, observations at a perpendicular  
266 angle show the complete circular nature of the pupillary shape with visible overlap from the  
267 iris and lack of aphakic gap correlated with high angle observations showing tilting of the  
268 lens. Second, differences in width between the anterior and posterior iris was often  
269 observed, indicating directional control of the protruding lens. Further research is needed to  
270 determine capabilities and limitations of multifocal lens in the Guppy.  
271

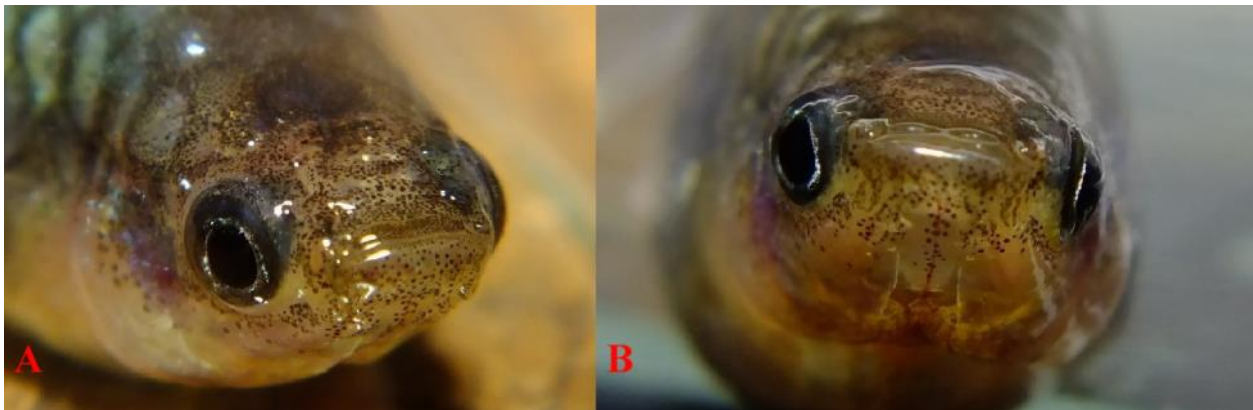

272  
273 **Fig 5. (A-B)** Jemez feral female (Pb/-). Live, anesthetized. This female was removed  
274 from a breeding group and is expressing dominant “dark-eye”, though this feature is often  
275 expressed in multiple females in this population when housed together. Both the iris and  
276 scleral ring contain melanophores, violet-blue iridophores and xanthophores.

277  
278 **III. Microscopic Observations: The eye of *Poecilia***  
279 ***reticulata* in homozygous Pb Pb/Pb, heterozygous Pb**  
280 ***Pb/pb* and non-Pb *pb/pb***

281 The ocular media of *P. reticulata* is comprised of a cornea, aqueous humor fluid, iris,  
282 lens, and surrounding vitreous humor fluid through which light passes to the retina. The  
283 lens of the Guppy is spherical in shape, allowing for a high degree of light refraction. Vision  
284 is clearest in the central portion of the eye and weakest along the periphery. Optimum

285 vision is achieved when the entire eye is pointed perpendicularly towards subject matter.  
286 Minor directional adjustments appear to be achieved, without repositioning of the body,  
287 through dorsoventral and anteroposterior adjustments of the lens within the pupil (Fernald  
288 1988).

289 Our study revealed that all major classes of chromatophores (melanophores,  
290 xanthophores, erythrophores, violet-blue iridophores) and crystalline platelets were present  
291 in the cornea, aqueous humor, vitreous humor, outer lens membrane and possibly the lens  
292 itself of *Poecilia reticulata*. Contrary to visual observations and conventional transmitted  
293 light microscopy the cornea, aqueous and vitreous humor are not clear under conventional  
294 reflected light microscopy. Each possesses independent populations of static and/or free-  
295 floating chromatophores. To the authors' knowledge this is the first time this has been  
296 reported in *P. reticulata*, though similar observations has been reported or summarized in  
297 other species either microscopically or biochemically (Dunlap 1989; Douglas 1989, 1999,  
298 2001; Thorpe 1992; Siebeck 2001; Soules 2005; Gray 2009; Shcherbakov 2013). Both  
299 static and free-floating corneal pigments have been documented in an earlier study in  
300 humans (Snip 1981).

301 Ocular microscopy, subsequent to enucleation or horizontal dissection of the eye, and  
302 lens and cornea extractions, revealed that chromatophores (melanophores, xanthophores,  
303 erythrophores, and violet-blue iridophores) and also crystalline platelets were present in the  
304 tissue comprising the cornea and iris, fluids of the aqueous and vitreous humors, and the  
305 membrane surrounding the lens in both Pb and non-Pb. Collected xanthophore populations  
306 were reduced in heterozygous Pb condition and removed in homozygous condition.  
307 Clustered xanthophores, found in all parts of the body and fins in "wild-type" Pb and non-  
308 Pb, remained intact in both heterozygous and homozygous Pb condition within the eye.

309 Microscopic "penetration" of the cornea and past the pupil (iris and lens juncture) by  
310 ocular focusing was more difficult to achieve in non-dissected specimens, especially in  
311 homozygous Pb condition, due to a proliferation of iris melanocytes producing a "reflective  
312 sheen". In general, this reflective sheen is noted to be more violet colored in Pb and more  
313 blue colored in non-Pb in wild-type, with much variability observed in Domestic Guppy  
314 strains vs. feral populations. The inability to penetrate the cornea by ocular focusing  
315 resulted from fully dispersed melanocytes between the cornea and lens, and / or contracted  
316 radial muscles of the iris (dilated pupils), as samples were prepared and initially viewed  
317 shortly after euthanasia.

318 Observations were taken 1 hour after euthanasia with both dissected and non-dissected,  
319 cornea intact and after cornea removal, allowed for greater microscopic penetration after  
320 melanocyte constriction. This revealed static melanophores in the cornea, iris and lens, and  
321 free-floating melanophores in the aqueous and vitreous humors, a dense layer of violet-blue  
322 iridophores, high xanthophore and minimal erythrophore populations. Population levels of  
323 each varied between Pb and non-Pb, among strains (populations), and within individuals.  
324 Thus, the presence of all chromatophore types should be considered the "normal" in Guppy  
325 ocular media, just as they are in the body and finnage.

326 The dense layer of violet-blue iridophores (Pb with a higher ratio of violet to blue, and  
327 non-Pb balanced ratio of violet to blue), under varying reflected light, was consistent over  
328 the entire pupillary region in both Pb and non-Pb. A dark violet reflective sheen over the  
329 pupil was frequently evident in Pb. In non-Pb it was often more difficult to observe this  
330 reflective sheen, and the appearance was bluer. It has long been thought that sensitivity to  
331 red and blue light are a heritable factor (Houde 1991, pg. 116, personal communication with  
332 Endler). We take this a step further to include sensitivity to UV and near-UV wavelengths  
333 as being heritable through Pb (Bias and Squire 2017a).

334 Results are presented in the following format and order: A. Non-dissected pupil and iris  
335 (**Fig 6-8**), partial dissection of eye (non-enucleated) with orbit, operculum and dentary  
336 intact viewed from high angle (**Fig 9-10**) and perpendicular (**Fig 11**), horizontal axis  
337 dissection of the eye with lower portions of orbit, operculum and dentary intact viewed from



338 high-angle (**Fig 12**), B. Protruding lens intact with cornea removed (**Fig 13-14**), C. Corneal  
339 Extraction (**Fig 15-21**), D. Aqueous Humor Fluid Extraction (**Fig 22-25**), E. Vitreous  
340 Humor Fluid Extraction (**Fig 26-28**), F. Lens complete extraction (**Fig 29-36**). All non-  
341 dissected images were taken from the right side and all dissection was done on the left side,  
342 unless otherwise indicated. I think you need to standardize the use of upper and lower case  
343 in these sections.

344

## 345 **A. Cellular Comparison: Iris and Pupil pigmentation**

346 *I.* Non-dissected samples (**Fig 6-8**) used full body specimens to incorporate complete  
347 spectral qualities of all chromatophore populations, both within and surrounding the eye.  
348 All images were under reflected lighting. *II.* Partial dissections (**Fig 9-11**) were on the left  
349 lateral side with incision along the median plane of the skull from mouth to supraoccipital,  
350 followed by dorsoventral removal to include the complete operculum and eye intact within  
351 the bony orbit. All images were under low angle reflected lighting. *III.* Horizontal axis  
352 dissection (**Fig 12**) of the eye (frozen) approximately mid-level with lower portions of orbit,  
353 operculum and dentary intact viewed from high-angle under reflected lighting. A resident  
354 population of chromatophores in the iris and their reflection into the pupillary region  
355 confirms the presence of an ocular media filter mechanism in *P. reticulata*.

356

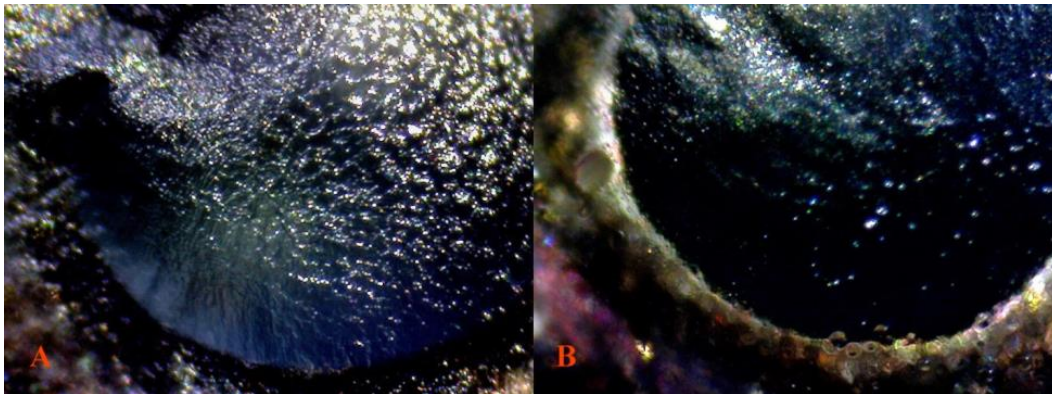

357

358 **Fig 6.** Wet mounts, no cover glass. **(A)** 18 Pb 40X 17 *Pb/Pb* (*non-dissected*) reflected light.  
359 Higher violet iridophore reflective sheen in the pupillary region, producing a more “purple”  
360 appearance. Isolated xanthophore presence, either reflected or resident in pupil. **(B)** 19  
361 non-Pb 40X 25 *pb/pb* (*non-dissected*) reflected light. Balanced violet-blue iridophore  
362 reflective sheen in the pupillary region, producing a more “blue” appearance. Isolated  
363 single cells appear to be reflected in the pupil.

364

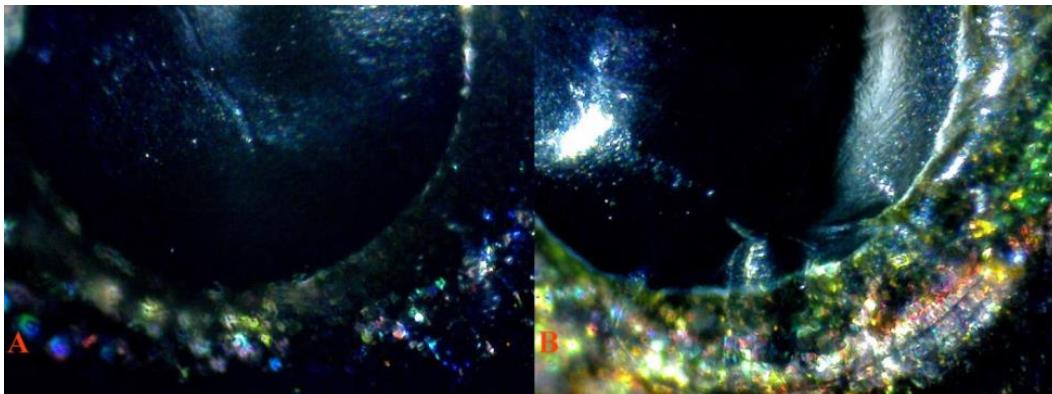

365

366 **Fig 7.** Wet mounts, no cover glass. **(A)** 23 Pb 40X 4 *Pb/pb* (*non-dissected*) reflected light.  
367 Higher violet iridophore reflective sheen in the pupillary region. Reduced xantho-

368 erythrophore content found in the iris. **(B)** 24 non-Pb 40X 3 *pb/pb* (*non-dissected*)  
369 reflected light. Balanced violet-blue iridophore reflective sheen in the pupillary region.  
370 Higher degree of variation in chromatophore types commonly found in non-Pb iris. Isolated  
371 single cells appear to be reflected in the pupil.  
372

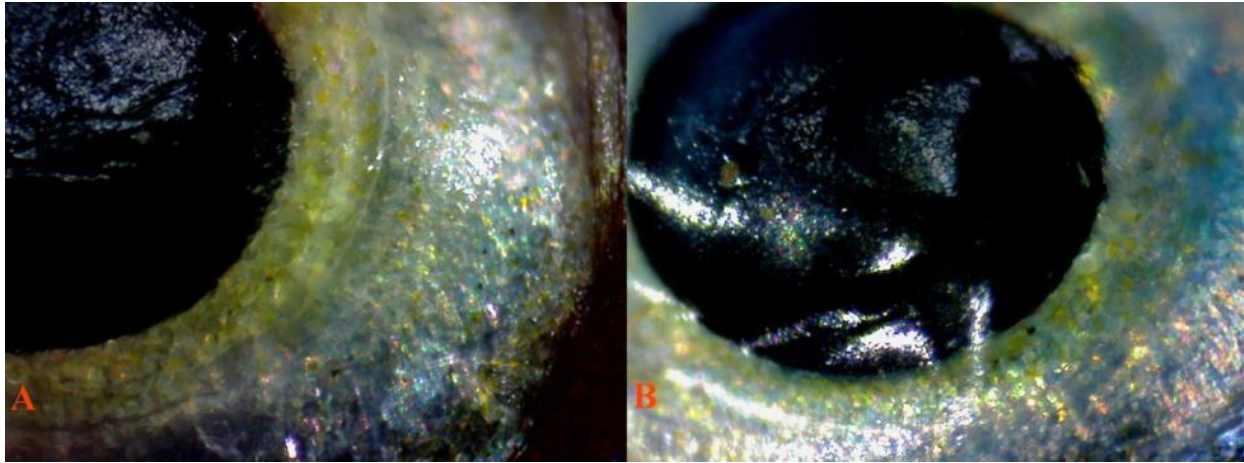

373  
374 **Fig 8.** Wet mounts, no cover glass. **(A)** Blond 29 Pb 40X 21 *Pb/Pb* (*non-dissected*)  
375 reflected light. Higher violet iridophore reflective sheen in the pupillary region, producing a  
376 more “purple” appearance. Reduced melanophore size (caused by the Blond mutation)  
377 visible in iris and likely similarly in the pupil region. **(B)** Blond 28 non-Pb 40X 13 *pb/pb*  
378 (*non-dissected*) reflected light. Balanced violet-blue iridophore reflective sheen in the  
379 pupillary region, producing a more “blue” appearance. Reduced melanophore size visible in  
380 iris and likely similar in the pupil region. Isolated single cells appear to be reflected in the  
381 pupil.  
382

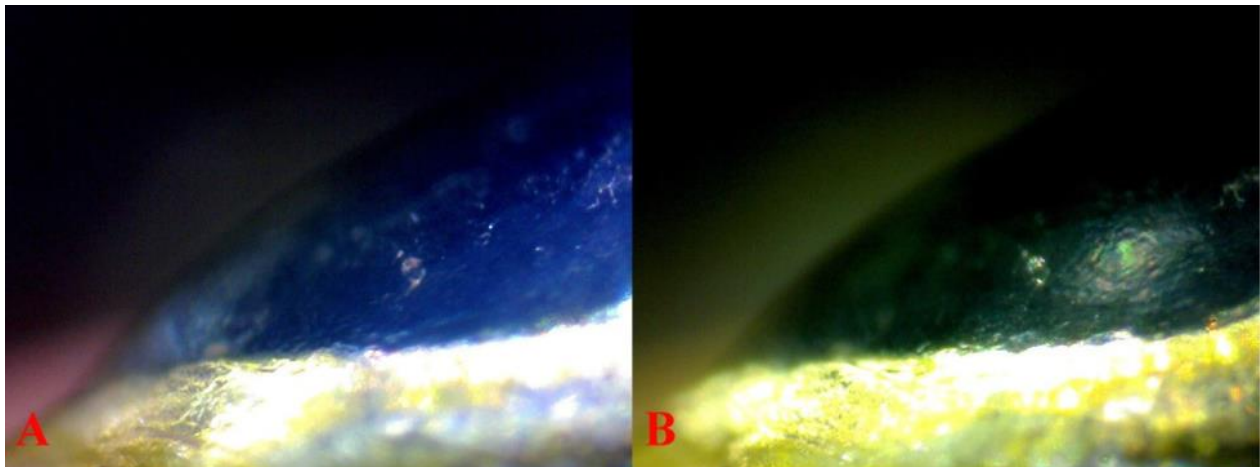

383  
384 **Fig 9.** Wet mounts, no cover glass. **(A)** 31 40X 9 *Pb/Pb* (*partial dissection*) low angle  
385 reflected light revealing iridophore reflective sheen in the pupillary region. **(B)** The same  
386 field, high angle reflected light revealing xanthophore reflective sheen in the pupillary  
387 region.  
388



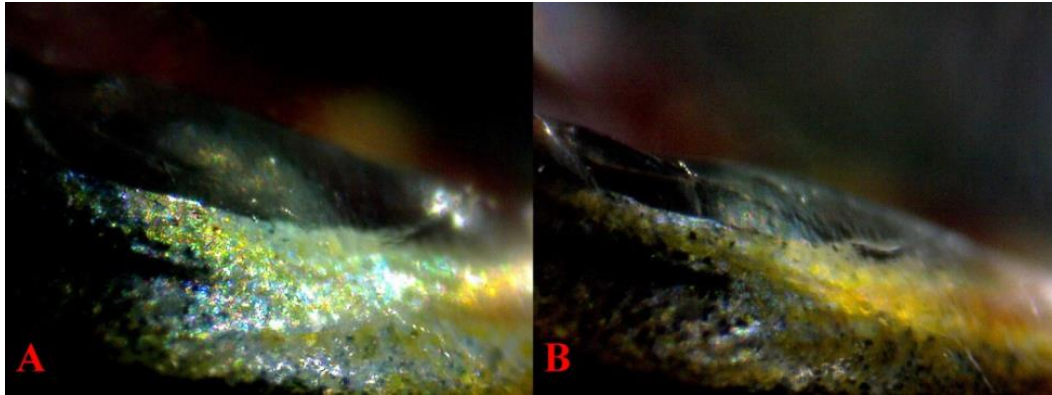

389  
390 **Fig 10.** Wet mounts, no cover glass. **(A)** 31 40X 11 *Pb/Pb* (*partial dissection*) reflected  
391 light. **(B)** 31 40X 19 *Pb/Pb* (*partial dissection*) reflected light. Both images clearly show  
392 xanthophore reflection from the cornea into the pupillary region.  
393

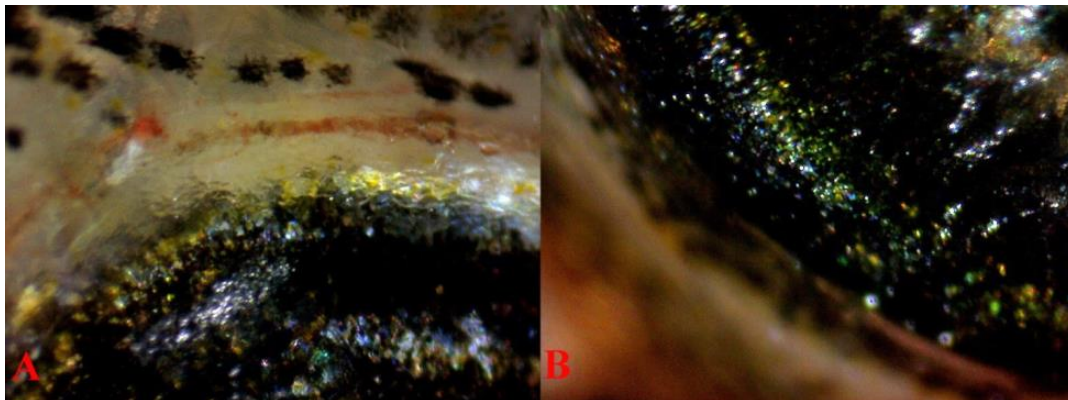

394  
395 **Fig 11.** Wet mounts, no cover glass. **(A)** 30 40X 3 *Pb/Pb* (*partial dissection*) reflected  
396 light, revealing chromatophore populations in the iris and scleral ring. **(B)** 30 40X 5 *Pb/Pb*  
397 (*partial dissection*) reflected light revealing chromatophore population in the iris. Each  
398 photo appears to show actual pigment cells in the cornea above the pupil.  
399

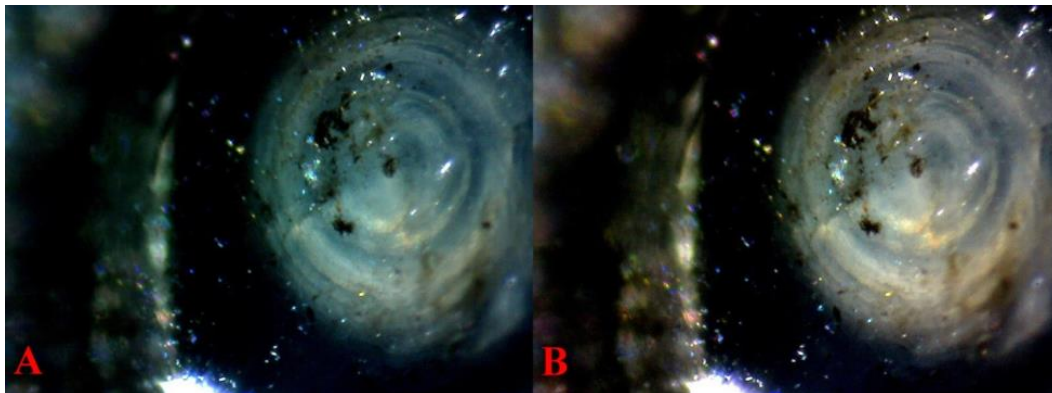

400  
401 **Fig 12.** Wet mounts, no cover glass. **(A)** 32 40X 5 *Pb/-* (*partial dissection*) reflected light,  
402 high angle. **(B)** The same field, reflected light with white balance adjusted. Superficial  
403 free-floating chromatophores are visible in the aqueous-vitreous humor. The cells over the  
404 lens appear to have been dislodged from vitreous humor. The "dark-matter" over the  
405 dissected lens plane appears similar, rather than inclusions within the actual lens.  
406 Reflection through the pupil opening is visible in lower left portion of images, from which the



407 lens has retracted. Approximately 60% of the ventral portion of the eye remains within the  
408 orbit.  
409

## 410 **B. Cellular Comparison: Protruding Lens Intact With True** 411 **Cornea Removed**

412 The removal of a portion of the scleral skin and the entire true cornea was performed on  
413 frozen specimens (**Fig 13-14**) to preserve the integrity of the structure and maximize the  
414 amount of cornea removed. Freezing of ocular media has been shown to have no significant  
415 effect (Douglas 2014). Extraction was performed from the right side of body with the  
416 incision made anterior to the clear central area of the pupil and extending slightly into the  
417 posterior side iris, providing complete exposure of the protruding lens. A resident  
418 population of chromatophores in the iris after corneal removal and their reflection into the  
419 pupil region again confirms the presence of an ocular media filter mechanism in *P.*  
420 *reticulata*.  
421

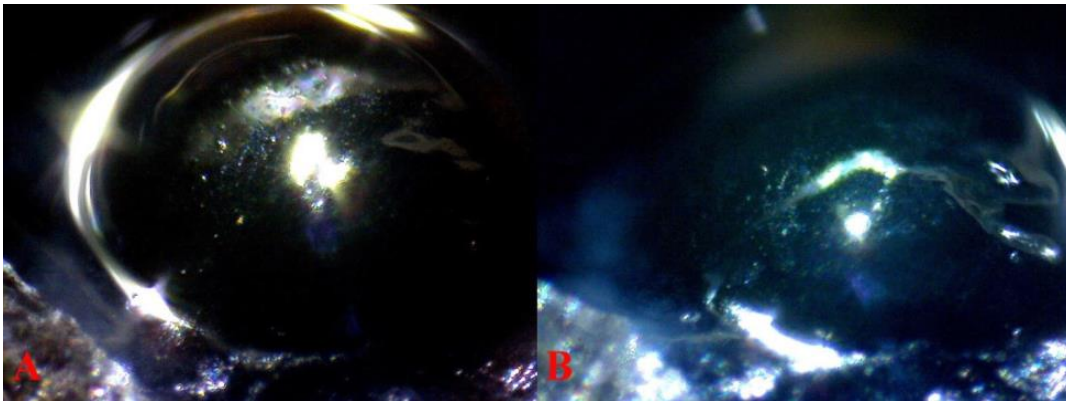

422  
423 **Fig 13.** Wet mounts, no cover glass. **(A)** 32 40X 15 Pb/- (*partial dissection*) low angle  
424 reflected light with white balance adjusted. Image taken at 45 degree angle. **(B)** The  
425 same field, reflected light with no white balance adjustment. In both images a small  
426 portion of the surrounding capsule of the lens anterior pole is partially missing after scleral  
427 skin and true cornea removal. The missing section can be seen in lower left of **Fig 17A** and  
428 **Fig 18A**. A xanthophore and violet-blue iridophore reflected sheen is seen in the protruding  
429 lens, over regions with and without the surrounding capsule.  
430

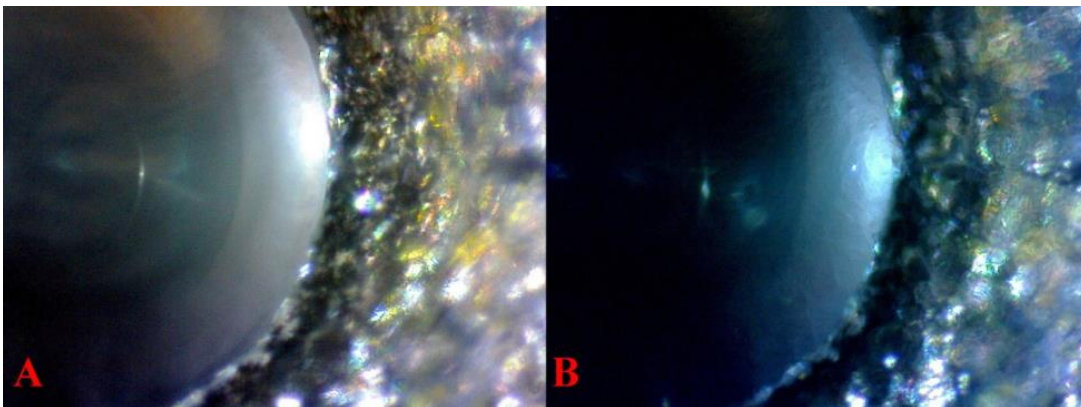

431  
432 **Fig 14.** Wet mounts, no cover glass. **(A)** 32 40X 10 Pb/- (*partial dissection*) high angle  
433 reflected light with white balance adjusted. **(B)** The same field, reflected light with no white  
434 balance adjustment. Lacking a cornea, xanthophore and violet-blue iridophore reflective

435 sheen is “muted” as seen over the protruding lens, and no reflected single cells are  
436 visible. In each view the lens nucleus is visible.  
437

### 438 C. Cellular Comparison: Corneal Extraction

439 The removal of a portion of scleral skin and entire true cornea was performed on frozen  
440 specimens to preserve the integrity of the structure and maximize the amount of cornea  
441 removed. Freezing of ocular media has been shown to have no significant effect (Douglas  
442 2014). Extraction was performed from the right side of body with an incision made anterior  
443 to the clear central area of the pupil and extending slightly into the posterior side of the iris.  
444 An effort was made to remove a very thin section of upper most exterior clear tissue and  
445 continuing into deep tissue of the true cornea to include all its layers (epithelium to  
446 endothelium), by cutting horizontally across the natural convex curvature of the eye. As  
447 desired, some iris tissue appears to be present on the exterior ventral portion of the  
448 samples. After removal the cornea was rinsed multiple times in saline solution, with  
449 prolonged soaking, to remove possible free-floating chromatophore contamination. When  
450 the cornea was viewed under a high magnification hand lens under transmitted light, no  
451 discoloration was apparent over the entire sample; i.e. it appeared clear. Microscopic  
452 results show otherwise.

453 In images (**Fig 15, 17-18**) on the lower exteriors is a thin section of clear tissue, in  
454 white (**A**) and black (**B**), from over the scleral layer of the cornea that extends over the  
455 entire underlying true cornea. The circular outline of cornea is visible to varying degrees.  
456 When enlarged, violet-blue iridophores and xantho-erythrophores are seen in the central  
457 portion of the cornea, which is comprised of all layers (epithelium to endothelium). Cells  
458 are believed to primarily reside in endothelial tissue and / or are attached to anterior  
459 portions of the surrounding capsule of the lens. Also minimally present are free-floating  
460 chromatophores of the aqueous humor not removed during multiple rinsings. Xantho-  
461 erythrophores, melanophores and iridophores in the central lower portion of the image are  
462 contained in attached underlying iris tissue. In image (**Fig 19**) at higher magnification and  
463 prepared as a permanent mount, the clarity of the true cornea is not visible, only the  
464 attached underlying portion of surrounding capsule of the lens (thick white). No reflective  
465 violet-blue iridophores are visible under transmitted light, and are visibly reduced in number  
466 under reflected light. Some cell positions can be identified under transmitted light, this  
467 suggests the majority are endothelial vs. epithelial positioned. Images (**Fig 20-21**) are of  
468 a single-rinsed thin dissection over the central pupillary region, lacking surrounding scleral  
469 or iris tissue. A single rinse was used to potentially distinguish between resident endothelial  
470 cells and free-floating cells above the cornea, below the cornea and beyond the cornea over  
471 the empty area of slide. While the appearance is much clearer, minimal endothelial  
472 chromatophores are suspended with higher numbers of free-floating cells visible on slide  
473 beyond the corneal tissue under both transmitted and reduced reflected light.  
474

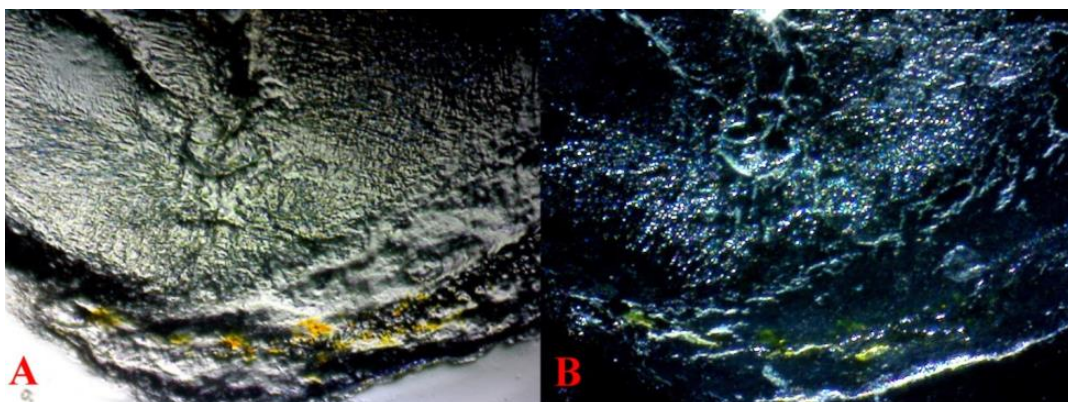

475



476 **Fig 15.** Wet mounts, no cover glass. Corneal extraction (A) 32 40X 2 *Pb*<sup>-/-</sup> (*dissection*)  
477 reflected and transmitted light with white balance adjusted. (B) The same field, reflected  
478 light with no white balance adjustment.  
479

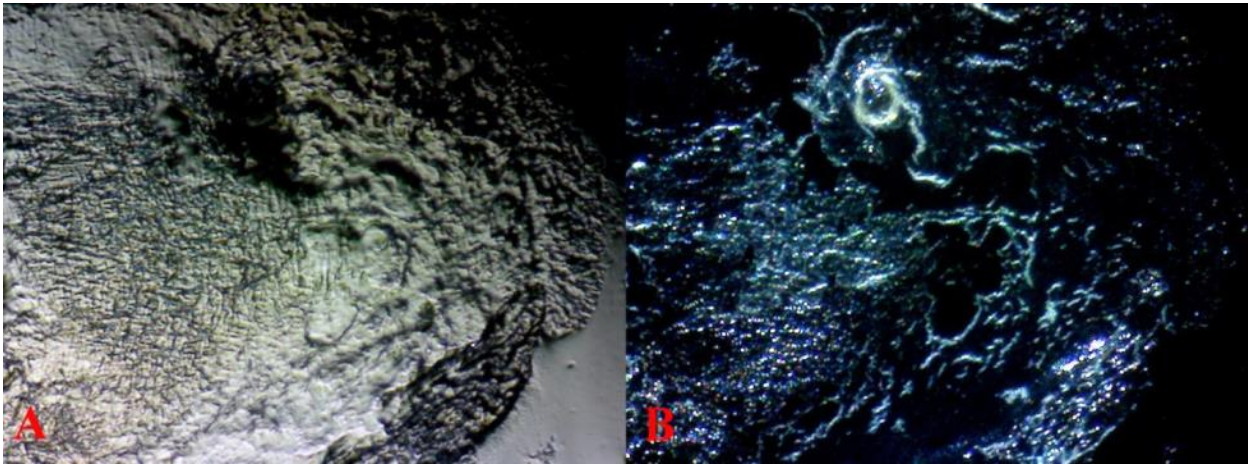

480  
481 **Fig 16.** Wet mounts, no cover glass. Corneal extraction (A) 32 40X 4 *Pb*<sup>-/-</sup> (*dissection*)  
482 reflected and transmitted light with white balance adjusted. (B) The same field, reflected  
483 light with no white balance adjustment.  
484

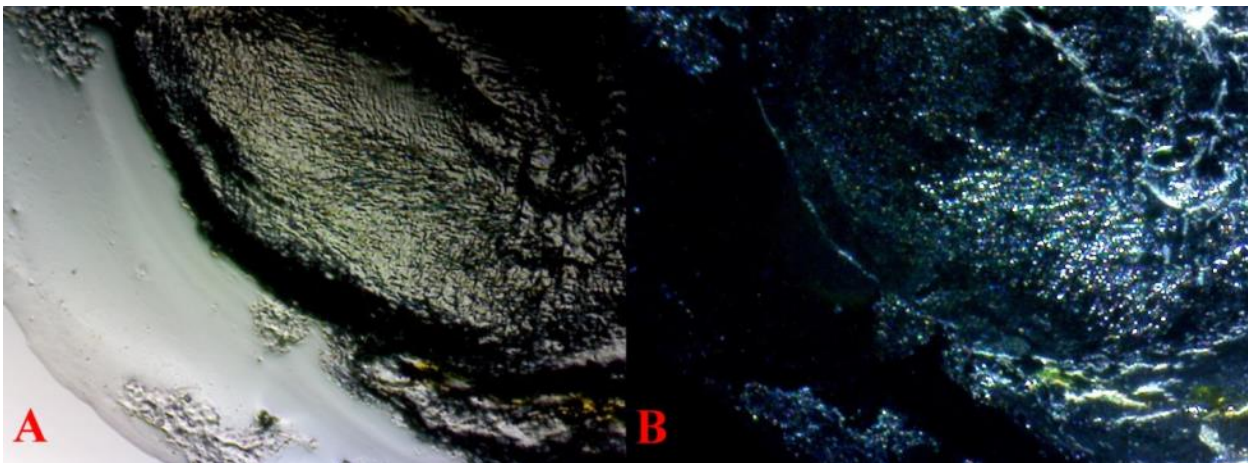

485  
486 **Fig 17.** Wet mounts, no cover glass. Corneal extraction (A) 32 40X 6 *Pb*<sup>-/-</sup> (*dissection*)  
487 transmitted light with white balance adjusted. (B) The same field, reflected light with no  
488 white balance adjustment. Single cells within exterior clear tissue (lower left) are free-  
489 floating from the aqueous humor, larger clusters are attached iris tissue (lower center),  
490 along with large area of xanthophores. When hydrated the clarity of true cornea is less  
491 visible in the central portion of the image with increased visibility of the attached underlying  
492 portion of the surrounding capsule of the lens. Violet-blue iridophores are visible in the  
493 central portion of the image (underlying the scleral and true cornea) under transmitted light  
494 and under reflected light. This indicates both endothelial positioning and free-floating cells.  
495 Black areas under reflected light are clear cornea devoid of any attached underlying tissue.  
496



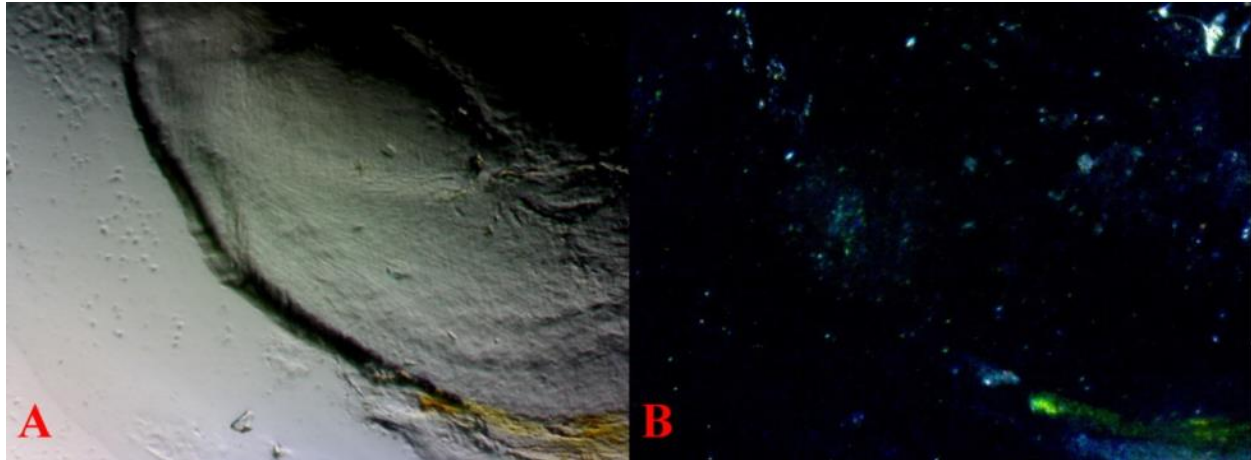

497  
498 **Fig 18.** Prepared mounts with cover glass. Corneal extraction **(A)** 32 40X 8 *Pb/-*  
499 *(dissection)* transmitted light with white balance adjusted. **(B)** The same field, reflected  
500 light with no white balance adjustment. Single cells within exterior clear tissue (lower left)  
501 are free-floating from the aqueous humor, larger clusters are attached iris tissue (lower  
502 center), along with a large area of xanthophores. When prepared as a permanent mount  
503 the clarity, the true cornea is visible in the central portion of the image with decreased  
504 visibility of the attached underlying portion of the surrounding capsule of the lens (thick  
505 white area). No reflective violet-blue iridophores are visible in the central portion of the  
506 image (underlying scleral and true cornea) under transmitted light, and visibly reduced  
507 under reflected light. This indicates both endothelial positioning and free-floating cells.  
508

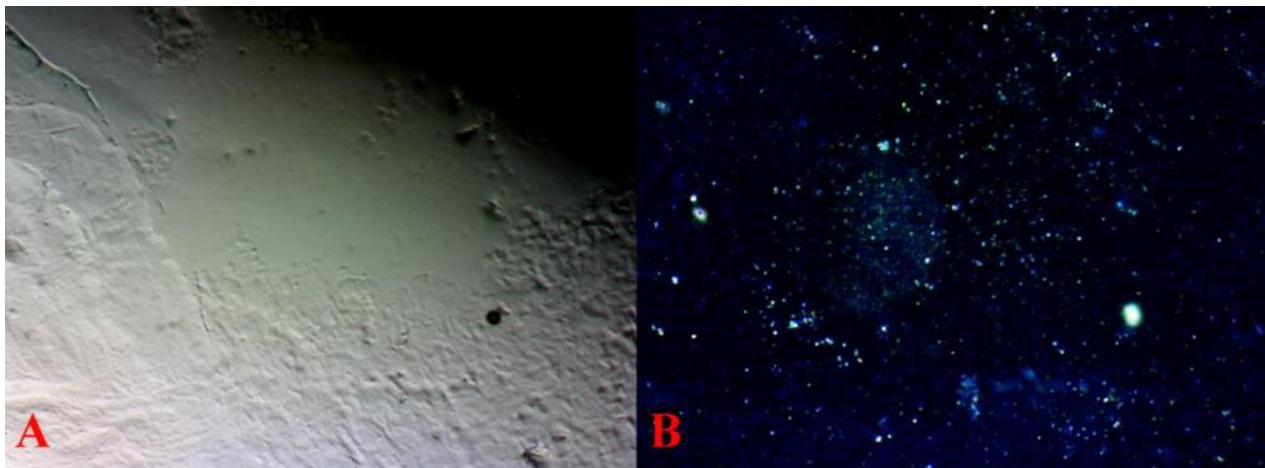

509  
510 **Fig 19.** Prepared mounts, with cover glass. Corneal extraction **(A)** 32 100X 9 *Pb/-*  
511 *(dissection)* transmitted light with white balance adjusted over central portion of the cornea.  
512 **(B)** The same field, reflected light with no white balance adjustment. When prepared as  
513 permanent mount at higher resolution the clarity of the true cornea is not visible in the  
514 image, only the visibly attached underlying portion of the surrounding capsule of the lens  
515 (thick white). No reflective violet-blue iridophores are visible under transmitted light, and  
516 visibly reduced under reflected light. This indicates both endothelial positioning and free-  
517 floating cells, as there is clear distinction in size of the latter being at a high level.  
518

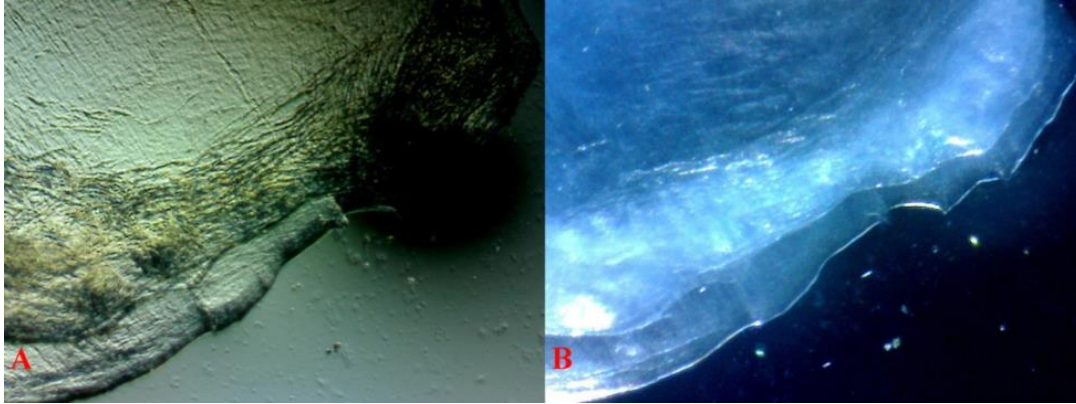

519  
520 **Fig 20.** Wet mounts, no cover glass. Corneal extraction (A) 34 40X 3 pb/- (dissection)  
521 transmitted light over the central portion of the cornea. (B) The same field, reflected light.  
522 Thin dissection over the central pupillary region, lacking surrounding scleral or iris tissue.  
523 While the appearance is much clearer, minimal endothelial chromatophores are suspended  
524 with minimal numbers of free-floating cells visible on the slide beyond the corneal tissue  
525 under both transmitted and reflected light.  
526

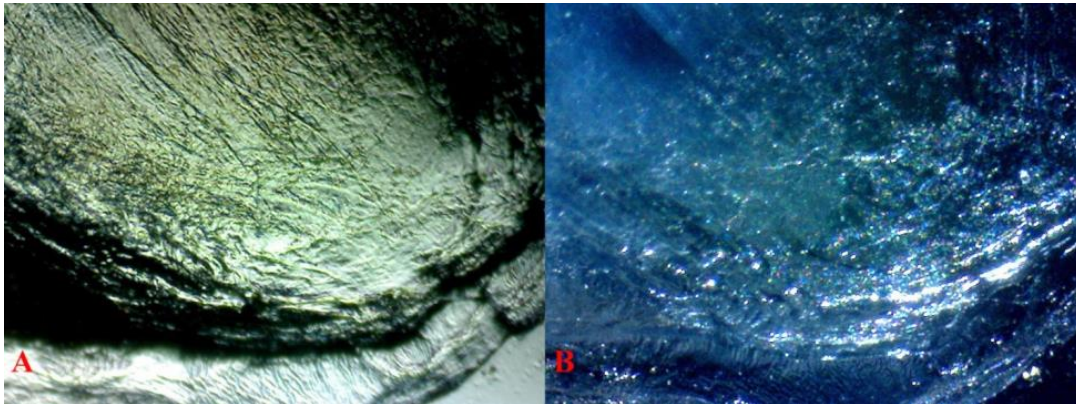

527  
528 **Fig 21.** Wet mounts, no cover glass. Corneal extraction (A) 34 40X 10 pb/- (dissection)  
529 transmitted light over the central portion of the cornea. (B) The same field, reflected light.  
530 Thin dissection over the central pupillary region, lacking surrounding scleral or iris tissue.  
531 While appearance is much clearer minimal endothelial chromatophores are suspended with  
532 higher numbers of free-floating cells visible on the slide beyond the corneal tissue under  
533 both transmitted and reduced reflected light.  
534

#### 535 **D. Cellular Comparison: Aqueous Humor Fluid Extraction**

536 Multiple samples of aqueous humor fluid, from several specimens, were obtained by low  
537 angle extraction with a 1ml BD Micro-Fine Insulin syringe. Each sample was compared  
538 against the others for vitreous contamination. The clearest of these were utilized in the  
539 microscopy study (Fig 22-25). The aqueous humor is generally clear under transmitted  
540 light with visible free-floating cells present. Consistency is slightly gelatinous from collagen  
541 and hyaluronic acid content. Under reflected lighting the true composition of the fluid is  
542 revealed in the form of a mind-boggling proliferation of violet-blue iridophores and xantho-  
543 erythrophores. Minimal amounts of dark matter were observed in some samples. It is  
544 possible they were pulled through the iris-lens juncture during the extraction process. A  
545 resident population of chromatophores in the aqueous humor fluid again confirms the  
546 presence of an ocular media filter mechanism in *P. reticulata*. The transmitted light views  
547 provide a rough estimate in terms of how much light is able to actually pass through the  
548 chromatophore smear, while the reflected light views of the same microscopic field provide



549 an appreciation for the density and variety of chromatophores in the aqueous humor. The  
550 light that passes through the chromatophore smear provides a rough estimate of the  
551 amount of light that could also pass through the aqueous humor on its way to the retina. It  
552 thus becomes apparent that while the chromatophore population is quite dense, it does not  
553 prevent considerable light from reaching the retina.  
554

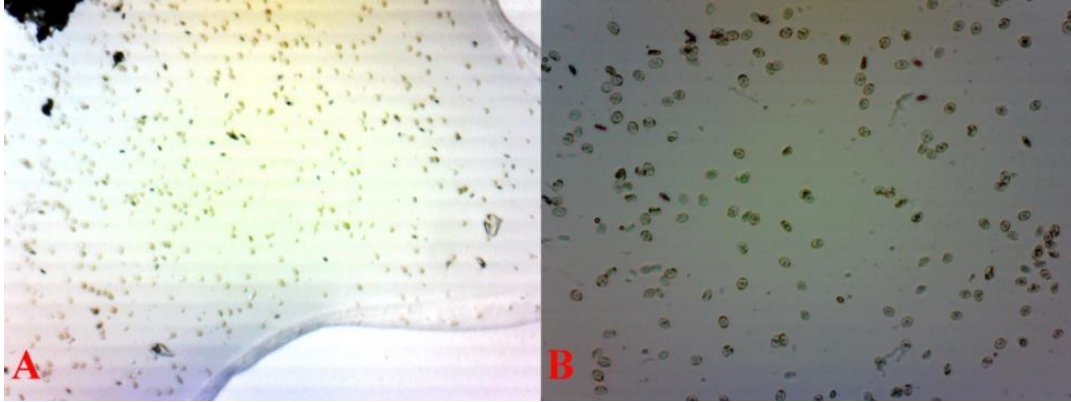

555  
556 **Fig 22.** Wet mounts, no cover glass. Aqueous humor fluid extraction **(A)** 32 40 6 *Pb/-*  
557 *(dissection)* reflected and transmitted light. **(B)** 32 100 7 *Pb/-* *(dissection)* transmitted light  
558 with white balance adjusted.  
559

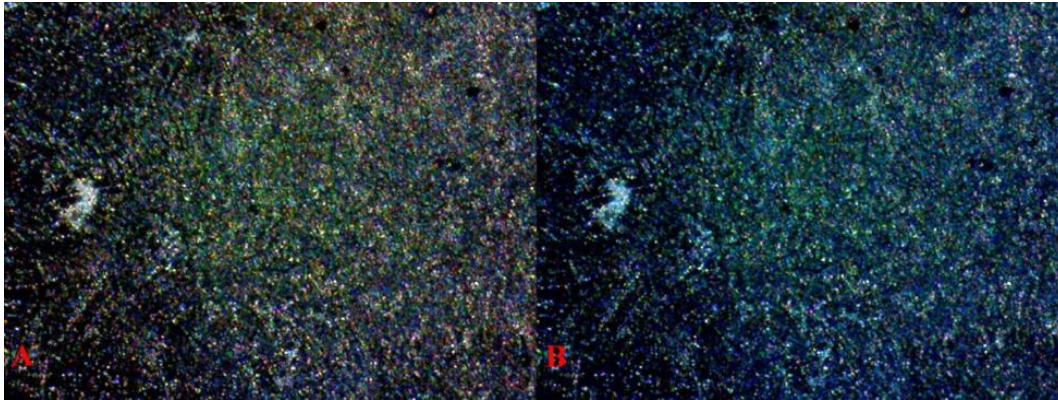

560  
561 **Fig 23.** Wet mounts, no cover glass. Metal Gold (Mg) male. Dehydrated aqueous humor  
562 fluid extraction **(A)** 36 40 2 *pb/pb* *(dissection)* reflected light with white balance adjusted.  
563 Notice increased xanthophore population. **(B)** The same field reflected light. Notice more  
564 blue appearance with balanced violet-blue iridophores.  
565

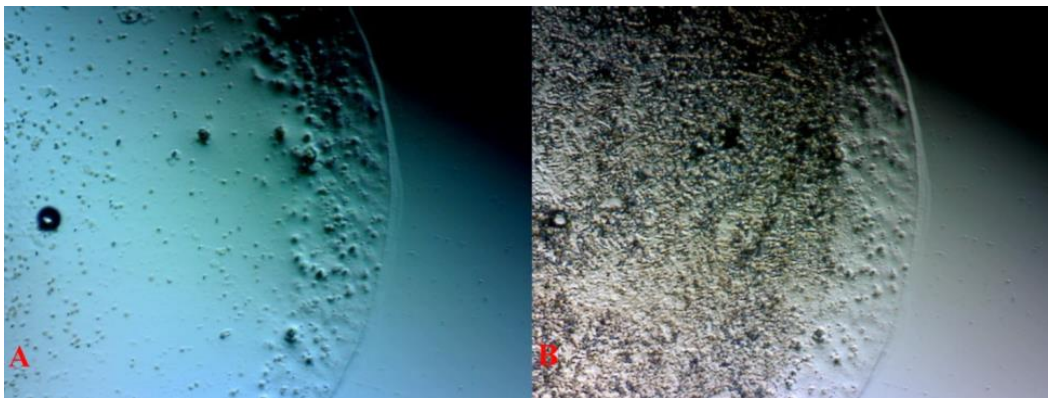

566



567 **Fig 24.** Wet mounts, no cover glass. Dehydrated aqueous humor fluid extraction (A) 33 40  
568 1 *Pb/-* (dissection) transmitted light. (B) The same field transmitted light with white  
569 balance adjusted.  
570

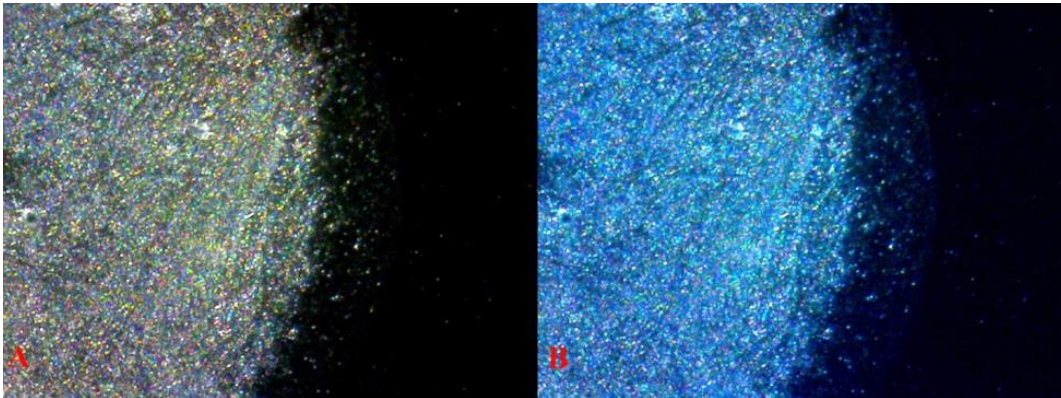

571 **Fig 25.** Wet mounts, no cover glass. Dehydrated aqueous humor fluid extraction (A) 33 40  
572 1 *Pb/-* (dissection) reflected light with white balance adjusted. (B) The same field  
573 reflected light.  
574  
575

### 576 E. Cellular Comparison: Vitreous Humor Fluid Extraction

577 Multiple samples of vitreous humor fluid, from several specimens, were obtained by  
578 deep penetration extraction with a 1ml BD Micro-Fine Insulin syringe. Each was compared  
579 against the other for consistency of type, and several selected for microscopy study (**Fig**  
580 **26-28**). Dissimilar to the aqueous humor, the vitreous humor is generally a mix clear fluid  
581 and large amounts of dark matter under transmitted and reflected light with visible free-  
582 floating cells present. Under reflected lighting the true composition of the fluid is revealed  
583 in the form of a mind-boggling proliferation of violet-blue iridophores and xantho-  
584 erythrophores. A resident population of chromatophores in the vitreous humor fluid again  
585 confirms the presence of an ocular media filter mechanism in *P. reticulata*. Again, the  
586 transmitted light views provide a rough estimate in terms of how much light is able to  
587 actually pass through the chromatophore smear, while the reflected light views of the same  
588 microscopic field provide an appreciation for the density and variety of chromatophores in  
589 the vitreous humor. The light that passes through the chromatophore smear provides a  
590 rough estimate of the amount of light that could also pass through the vitreous humor on its  
591 way to the retina. It thus becomes apparent that while the chromatophore population is  
592 quite dense, it does not prevent considerable light from reaching the retina.

593

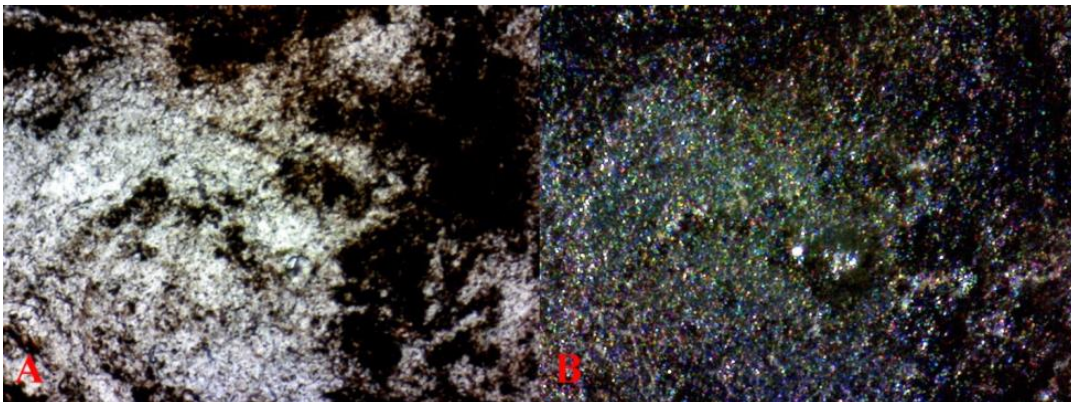

594 **Fig 26.** Wet mounts, no cover glass. Vitreous humor dehydrated (A) 31 40X 1 *Pb/Pb*  
595 transmitted light with white balance adjusted. (B) The same field, reflected light with white  
596

597 balance adjusted. Notice xanthophores are present with more violet expression form higher  
598 concentration of violet iridophores  
599

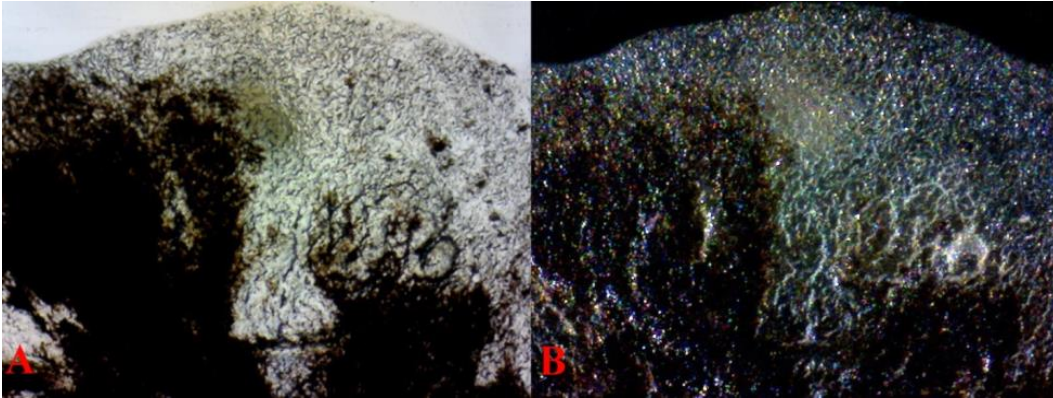

600  
601 **Fig 27.** Wet mounts, no cover glass. Vitreous humor partially dehydrated (A) 31 40X 3  
602 *Pb/Pb* transmitted light with white balance adjusted. (B) The same field, reflected light with  
603 white balance adjusted. Notice xanthophores are present with more violet expression form  
604 higher concentration of violet iridophores  
605

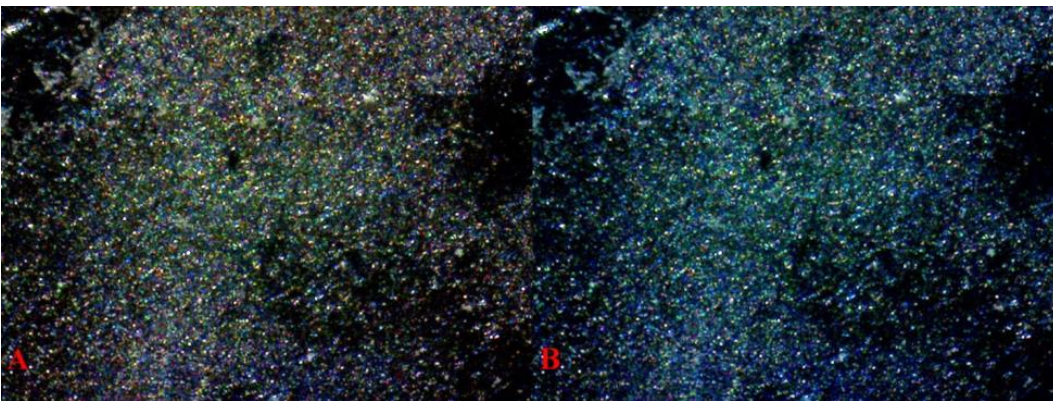

606  
607 **Fig 28.** Wet mounts, no cover glass. Metal Gold (*Mg*) male. Dehydrated aqueous humor  
608 fluid extraction (A) 36 40 2 *pb/pb* (*dissection*) reflected light with white balance adjusted.  
609 Notice the increased xanthophore population corresponding to the *Mg* mutation. (B) The  
610 same field reflected light. Notice more blue appearance with balanced violet-blue  
611 iridophores. Both photos express higher melanophore populations as compared to prior  
612 aqueous humor images.  
613

## 614 **F. Cellular Comparison: Lens Extraction**

615 Micro-dissection of the lens was performed on several enucleated eyes (**Fig 29-36**).  
616 After complete lens extraction each lens was saline rinsed multiple times in ethyl alcohol  
617 with prolonged soaking to remove potential loose surface contaminants adhering during  
618 extraction. Microscopy was performed with the surrounding membrane intact, partially  
619 ruptured, and removed. The lens was revealed to be semi-transparent and highly reflective  
620 under reflected light. While "chromatophore color" was not reliably detected within the  
621 crystalline lens, it was consistently observed in tissue or fragments of the surrounding  
622 membrane adhering to the anterior pole of the lens. Melanophores, violet-blue iridophores  
623 and xanthophores were seen in these tissue fragments. Chromatophore presence in the  
624 surrounding membrane indicates chromatophore populations residing internal to the  
625 aqueous humor fluid and iris. A resident population of chromatophores in the surrounding



626 membrane of the lens again confirms the presence of an ocular media filter mechanism in *P.*  
627 *reticulata*.  
628

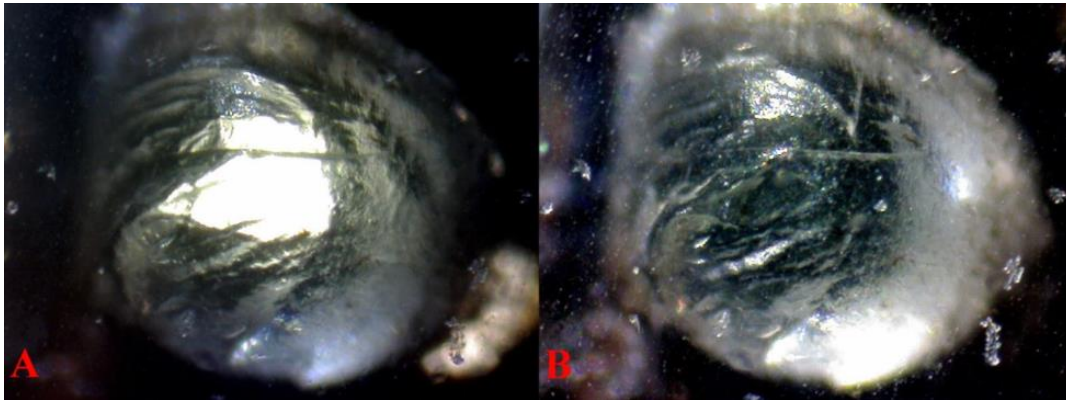

629  
630 **Fig 29. (A)** 17 40X 7 Pb/Pb (full dissection and partial extraction) reflected and  
631 transmitted light. **(B)** The same field, transmitted light.  
632

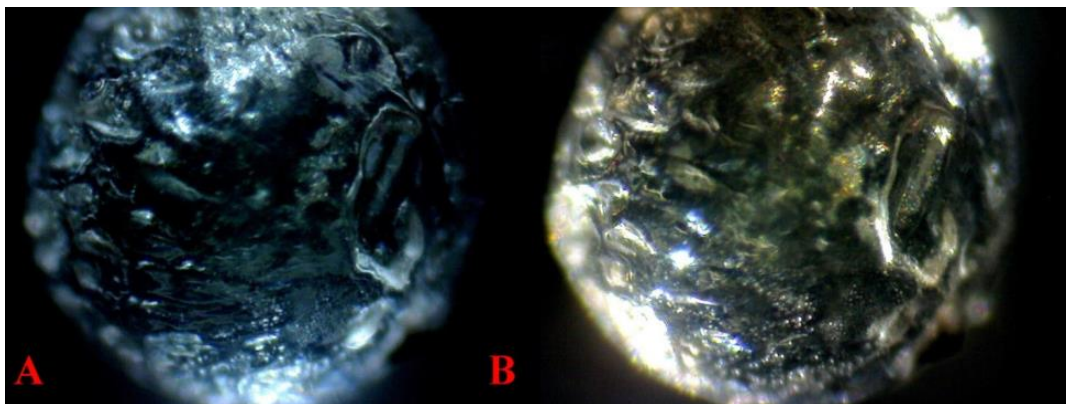

633  
634 **Fig 30. (A)** 30 40X 14 Pb/Pb (full dissection and extraction) reflected light. **(B)** The same  
635 field, reflected light with white balance adjusted.  
636

637 Several lenses were intentionally crushed with compression between the glass slide and  
638 the cover slip. A clear distinction was revealed between ruptured tissue fragments (with  
639 chromatophore populations) and the fractured rigid crystalline epithelial cells (**Fig 30A-B**).  
640 Further distinction was visible between fractured epithelial cells forced into underlying  
641 reflective crystals within the cortex and the lens itself. Reflective qualities, both yellow and  
642 blue, were detected in epithelial cells from the germinative zone of the lens (**Fig 31**).  
643

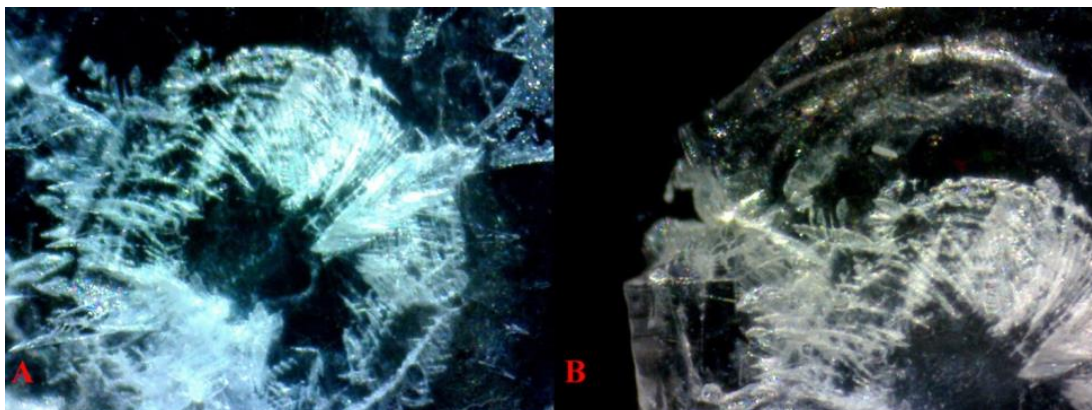

644

645 **Fig 31.** Compressed Iris. **(A)** 30 Pb 40X 24 Pb/- (*full dissection and extraction*) reflected  
646 light. **(B)** 30 Pb 40X 27 Pb/- (*full dissection and extraction*) reflected light. With white  
647 balance adjusted. In both images (top right) the ruptured surrounding membrane of the  
648 lens showing high levels violet-blue iridophores and xantho-erythrophores is present. Also,  
649 a section of membrane is visible behind the center nucleus. Scattered collections also  
650 appear in fragments of the membrane. Fractured crystalline epithelial cells appearing as  
651 long-linear structures appear devoid of any chromatophore populations.  
652

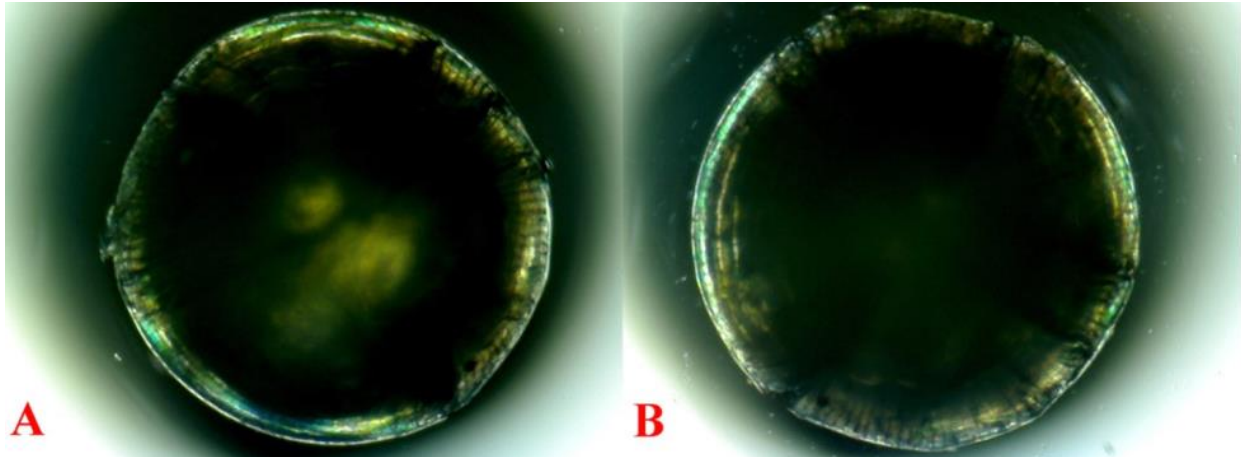

653 **Fig 32.** **(A)** 31 40X 27 Pb/Pb (*full dissection and extraction*) reflected and transmitted  
654 light. **(B)** 31 40X 29 Pb/Pb (*full dissection and extraction*) reflected and transmitted light.  
655 Reflective xanthophores and iridophores present in epithelial cells along the outer  
656 germinative zone of the lens. They are in turn reflected by the central nucleus of the lens.  
657  
658

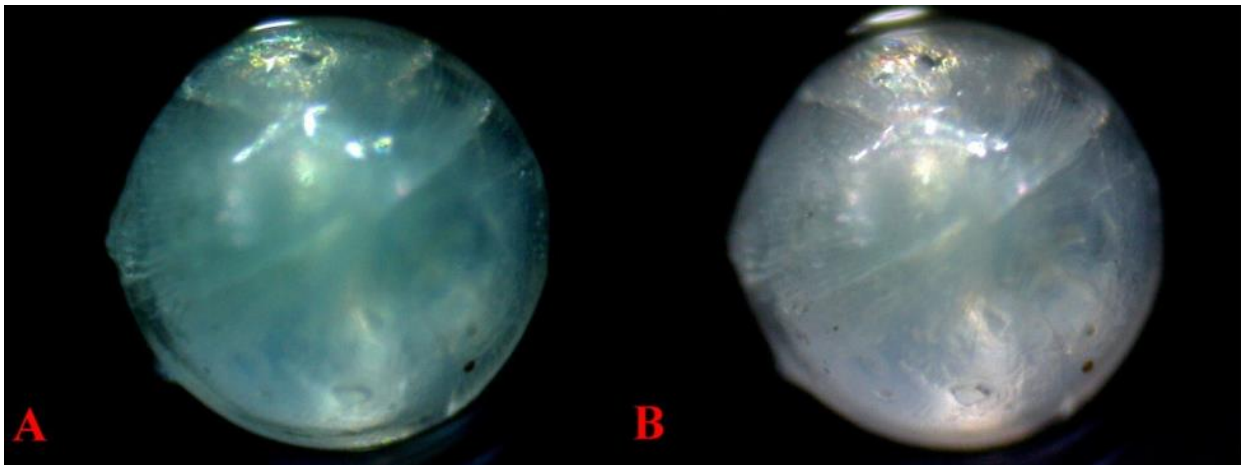

659 **Fig 33.** **(A)** 31 40X 27 Pb/Pb (*full dissection and extraction*) reflected light. **(B)** The same  
660 field reflected light and white balance adjusted. Reflective pigments from the germinative  
661 zone are visible in the upper center. This lens was extracted from an aged female. Large  
662 opaque cortical cataracts "spokes" are visible in the central cortex of the lens. An apparent  
663 opaque nuclear cataract "cloudiness" appears in the central nucleus of the lens and anterior  
664 membranous inclusion is visible in the lower right. These pathological changes are  
665 consistent with UVB damage.  
666  
667



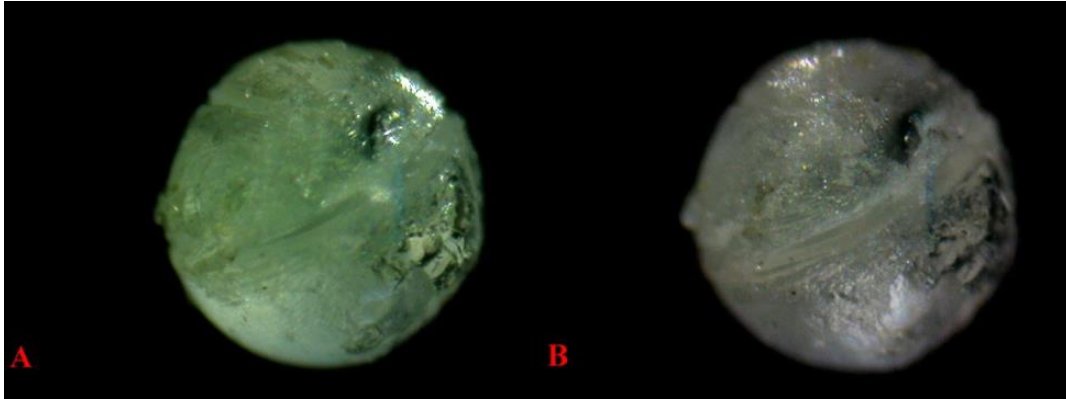

668  
669 **Fig 34.** (A) 31 40X 27 Pb/Pb (full dissection and extraction) reflected light. (B) The same  
670 field reflected light and white balance adjusted. Chromatophores are detected within the  
671 surrounding membrane “capsule” of the lens. The deep circumventing indentation around  
672 the lens is likely the result of underlying cortical cataracts noted previously. Large areas of  
673 melanophore and violet-blue iridophore on the lens anterior capsule (lower right) appear to  
674 result from the iris adhering to the lens (synechia).  
675

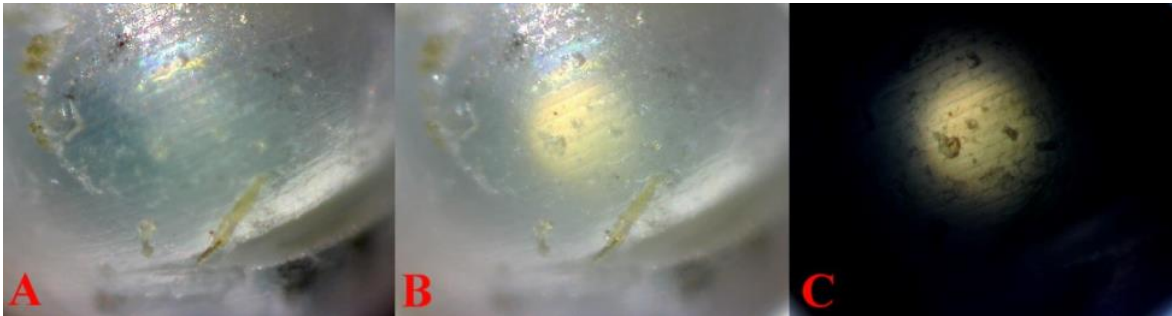

676  
677 **Fig 35.** (A) 31 100X 2 Pb/Pb (full dissection and extraction) reflected light. Isolated  
678 reflective cells detected in the surrounding membrane. Defective anterior membrane  
679 inclusions (xanthophores and melanophores were described previously). Posterior sub-  
680 capsular cataracts “granular deposits” appearing milky white. (B) The same field reflected  
681 and transmitted light. Defective anterior membrane inclusions (xanthophores and  
682 melanophores described previously). Posterior sub-capsular cataracts “granular deposits”  
683 appearing milky white. (C) The same field transmitted light. Posterior sub-capsular  
684 cataracts “granular deposits” appearing dark colored. These pathological changes are  
685 consistent with UVB damage.  
686

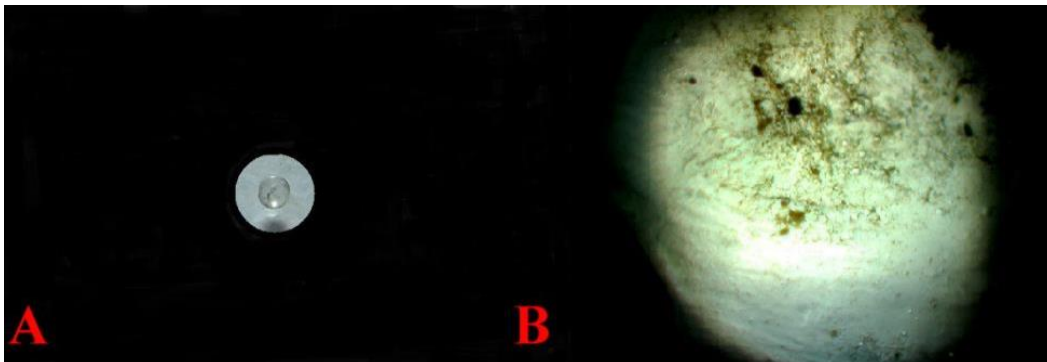

687  
688 **Fig 36.** Macroscopic view of an extracted lens after multiple saline and alcohol rinses with  
689 prolonged soaking time. (A) 35mm, Focal length 30.3mm, F stop: F/5, Exposure time:  
690 1/240 second, Metering mode: spot, Exposure compensation: -2step. Pb/- (dissected)

691 Slave flash. Large anterior capsule inclusion is visible in the center of the lens. **(B)** 30  
692 100X 4 *Pb*/- (*dissected*) transmitted light white balance adjusted. Large areas of  
693 melanophores on the lens anterior capsule (lower right) appear to result from the iris  
694 adhering to the lens (synechia).  
695

## 696 Discussion and Conclusions

697 *Pb* has been identified as the first polymorphic autosomal gene to be described as  
698 existent in high frequencies in wild, feral and Domestic Guppy populations. It is capable of  
699 pleiotropic effects on all existing color and pattern elements at multiple loci. It should  
700 therefore be considered a strong candidate for further studies involving “the relationships  
701 between spectral and ultrastructure characteristics” in orange ornamentation, and extending  
702 to color and/or pattern as a whole as suggested by Kottler (2014). A mechanism was  
703 identified by which *Pb* is capable of balancing overall color and pattern polymorphisms, in  
704 turn providing fitness through heterozygosity in diverse complex habitats (Bias and Squire  
705 2017a, 2017b). We hope that Purple will be mapped to its linkage group.

706 All major classes of chromatophores (melanophores, xanthophores, erythrophores,  
707 violet-blue iridophores) and crystalline platelets in the iris and ocular media (cornea,  
708 aqueous humor, vitreous humor, outer lens membrane), and possibly the lens itself of  
709 *Poecilia reticulata* affect the transmission of light into the eye and along the visual path to  
710 the retina. The relative proportions of these chromatophores depend upon the genotype.  
711 Thus in the case of the Metal Gold (*Mg*) mutant shown in **Fig. 28**, there is a relative  
712 increase in the number of xanthophores in the aqueous and vitreous humors. An albino  
713 mutant (not used in this study, but shown and discussed in Bias and Squire (2017c) would  
714 lack all melanophores in the ocular filter system.

715 Although 10 opsins were found in guppies by Laver (2011), only four opsins were  
716 expressed at high frequencies (% relative abundance): A180 ~20% in adults, RH-2 >40%  
717 in females and juveniles, ~30% in males, and SWS2B >25% in adults. Their expression  
718 data led them to assign the 359/389 nm to UVA SWS1, the 408nm peak to violet SWS2B,  
719 the 465nm peak (Middle Wave Length, or blue) to RH2-2, and the cones with 533nm,  
720 543nm and 573nm (Long Wave Length or green to yellow) peaks to A180 and others at low  
721 frequencies. These are peak values, and each would produce a curve extending in both  
722 directions. They found the S180 gene produces Long Wave Length 560nm cones that would  
723 detect yellow, and the S180r gene (functioning at lower levels) produces 572nm cones,  
724 which would also respond to yellow. They appear to be the cones responding to orange and  
725 red colors. The other opsins that are present at low levels are also functionally important,  
726 especially with regard to this study. This was also reported in the Cumaná guppy by Endler  
727 (2001), and Watson (2010). Watson quotes Archer (1990) as saying that the absorption  
728 spectra for the cones of the Trinidadian guppy are somewhat different, with a UV peak at  
729 389 instead of 359.

730 Grether (2008) showed the absorbance spectra for guppy carotenoids from eggs and  
731 skin. The curves were slightly different, but both peaked at around 440nm with a second  
732 lower peak at 475nm dropping sharply before 500nm. The curve continued into the lower  
733 range with a low at around 355nm and then rising again to 300nm where the graph  
734 stopped. Grether (2001) showed both the absorbance spectra for carotenoids and  
735 drosopterin extracted from orange spots of male guppies in their Fig. 3. They also showed  
736 the simulated reflectance spectra for different ratios of carotenoid and drosopterin ratios. In  
737 their Fig. 4 they showed (in addition to other values) the mean orange-spot reflectance  
738 spectra for guppies in the field. This reflectance begins at a value of “0.20” and starts  
739 dropping at around 570nm and by around 510nm has reached a low value of around “0.06”.  
740 The reflectance value of drosopterin starts dropping as its absorbance value increases. The  
741 absorbance value of guppy carotenoid starts increasing at lower wavelengths.

742 Actual reflectance spots showed the highest values for violet spots (Kemp 2009) in male



743 guppies from the transplanted Trinidadian colony in an upper stream of the El Cedro River  
744 where the main predator is a Pike Cichlid, *Crenicichla alta*. “Reflectance spectra captured  
745 from the four most common colour pattern elements of El Cedro fish (orange spots,  
746 iridescent blue spots, blue/violet iridescence and iridescent green/blue) are represented...  
747 All colour elements are characterized by a strong reflectance peak...in the region of 370–390  
748 nm, thus indicating a strong UV component. In perceptual terms, the largest and most  
749 consistent difference between the populations is that all viewers would perceive brighter  
750 iridescent blue/violet markings in introduction site fish...” Therefore these male guppies  
751 were utilizing UV light in the near visible end of the UV spectrum.

752 According to Weadick (2012), this pike cichlid (known both as *C. alta* and as *C. frenata*)  
753 has apparent absence of an SWS1 opsin and some synthesis of SWS2a and SWS2b UV  
754 sensitive opsins. These later two opsins may be present in low amounts and the authors  
755 state that “this fish may be relatively insensitive to UV light and unable to discriminate hues  
756 in the lower part of the visual spectrum. If this is the case, guppies could potentially use UV  
757 light as a private communication channel as they do possess an UV-sensitive cone”. They  
758 refer to Archer (1990). They also point out that there is some variation in the visual  
759 capability of Pike Cichlids from different sites, and it is quite possible that other populations  
760 may have completely lost the ability to see in the UV spectra, as had been earlier stated by  
761 Endler (1991).

762 To summarize our comments so far then: guppies produce opsins that are sensitive to  
763 UV down to at least 250nm and probably somewhat lower. This range includes the  
764 reflectance peaks in the region of 370-390nm. As would be expected, guppies are able to  
765 detect the UV reflectance of their neighbors, as well as colors in the visible spectrum. An  
766 obvious question then would be “Why are the eye capsule, cornea, aqueous humor, vitreous  
767 humor, outer lens membrane pigmented? What are the selective benefits provided by this  
768 pigmentation?” Ultra violet light includes the range of 100 – 400nm. It is destructive; its  
769 absorption causes cell damage and cell death.

770 Melanin is known to absorb UV light and thus prevent it from harming cells. Human dark  
771 skin color and tanning are examples of this protective function in humans (McGraw 2005).  
772 Further, a number of reports indicate that both the cornea and the lens act as UV filters in  
773 many if not most species of vertebrates (Nelson 2001). It is generally held that when UV  
774 filtration occurs the cornea is the first UV filter, and the lens is the second. Thorpe (1993)  
775 found that the guppy cornea (of an unidentified population) transmits 50% of incident UV at  
776 315nm. This indicates that the guppy lens is not a major filter of UVA wavelengths (320-  
777 400nm). But it may be a significant blocker of UVB rays (280-320nm).

778 Judging from Fig. 3 of Grether (2001) the absorbance values of drosopterin become  
779 significant by 525nm and increases to a peak around 480nm and gradually diminishing.  
780 Likewise the absorbance values for guppy carotenoids seem to become significant around  
781 490nm and extend to below 400nm (the limit of their figure). They point out that  
782 absorbance values for intact cells will vary from those of the extracts used in their study.  
783 Carotenoids are antioxidants (Svensso 2011). Thus melanin, drosopterin and guppy  
784 carotenoids absorb UV light and can provide protection against its damage.

785 The presence of melanophores (melanin), xanthophores (carotenoids), xantho-  
786 erythrophores and iridophores (guanine absorbs UV light) all provide protection from UV-  
787 induced damage to the structures over which they are located. These cells are present in a  
788 very thin layer over the cornea and the lens, and thus would allow the passage of UV and  
789 other wavelengths through them with minimal absorption. This would cause accumulated  
790 damage over time and would produce the cataracts and milky deposits seen in the lens from  
791 an old female in **Fig. 32 and 34**. The thick layer of melanophores and the dense layer of  
792 violet-blue iridophores in the iris provide protection against UV-induced damage.

793 What is the function of the violet-blue iridophores and xantho-erythrophores found in  
794 the aqueous and vitreous humors? These humors are part of the pathway of light that  
795 passes through the cornea, the aqueous humor, the lens, the vitreous humor, and then

796 stimulates receptor cells in the retina itself. The aqueous humor is interposed between the  
797 cornea and the lens and the vitreous humor between the lens and the retina. As such they  
798 may act as visual filters, perhaps by absorbing additional UV light, and they attenuate the  
799 degree of exposure of the retinal cells themselves. A number of UV-absorbing compounds  
800 are known (proteins, amino acids and derivatives thereof, ascorbic and uric acid) from  
801 cornea, aqueous humor, and lens of vertebrate eyes (Ringvold 2003), but we are unaware  
802 of any reported ocular filter systems using intact pigment cells rather than dissolved  
803 molecules. (We did not examine dissolved molecules from the eyes in this study.) These  
804 cells have a greater absorptive ability for UV in the wavelengths below those used by the  
805 guppy opsins. Melanins, carotenoids and pteridines are also antioxidants and would tend to  
806 remove free radicals before they harm important cells and structures.

807 The medical role of pterins (pteridines) as antioxidants in immunology is so important  
808 that pterin levels are used as a clinical biomarker of immune performance (McGraw 2005).  
809 UV light has more energy per photon than any other wavelength of light that reaches the  
810 earth's surface. These highly energetic photons damage many kinds of biological molecules,  
811 of which DNA and proteins are the most obvious. They also cause chemical reactions that  
812 produce "reactive oxygen species" (ROS). These chemically reactive molecules then cause  
813 additional damage. Dissolved organic carbon (DOC) reduced UV penetration and thus is a  
814 protective factor in the aquatic environment. Fish in shallow water are more at risk of UV  
815 damage. This damage may affect fish eggs and young fish as well as adults. (Zagarese,  
816 2001; Gouveia 2015). When studying Atlantic cod eggs, Kouwenberg (1999), found no  
817 evidence of detrimental effect of UVA radiation (320-400nm). However they found  
818 considerable mortality from UVB (280-320nm). Douglas (1999) states that "no ocular  
819 structure will transmit significant amounts of radiation below about 310nm due to  
820 absorption by its nucleic acids and various structural protein components, such as aromatic  
821 amino acids." Of course this absorption damages the molecules and structures involved.

822 This does not infer that UVA is not potentially harmful to guppies! All UV radiation is  
823 potentially harmful. In this regard, the melanophores, xanthophores and iridophores  
824 reported in the membranes surrounding the spinal cord of guppies (Bias and Squire, 2017b)  
825 may also provide protection against UV damage (Gibson 2009). Thus the potentially less  
826 harmful UVA is being used in the guppy UV ornament-UV opsin system. But the more  
827 harmful UVB needs to be filtered out more thoroughly. It would seem that the tendency of  
828 young guppies to hide in dense plant growth may shield them from UV damage as well as  
829 provide a hiding place from predators. It is conceivable that the violet-blue iridophores  
830 (absorbance of UVB and potential scattering of UVA) and xantho-erythrophores  
831 (absorbance) have a strong filtering capacity in the UVB range.

832 Douglas (1989) comments that since fish with short-wave absorbing filters deprive  
833 themselves of the potential benefits of UV sensing they must gain a sufficient adaptive  
834 advantage to make up for it. But we would suggest that these do not need to be mutually  
835 exclusive alternatives. They refer to Walls' (1933) proposal that "short-wave absorbing  
836 filters may lead to increased visual resolution, contrast and visual range, by decreasing (i)  
837 the degree of chromatic aberration, (ii) the amount of scattered light reaching the retina,  
838 and (iii) the glare from the bright down welling illumination, all of which are highest at short  
839 wavelengths." We propose that the guppy has achieved a balanced system in which a  
840 reduced amount of UVA reaches the retinal UV receptors, while at the same time excluding  
841 much of the damaging UVB radiation.

842 The presence of large numbers of iridophores in this system is noteworthy. Violet-blue  
843 iridophores were present in the cornea, the outer lens membrane was saturated with violet-  
844 blue iridophores, and they were present in high numbers in both the aqueous and vitreous  
845 humors. Tovée (1995) suggests a different possible aspect to UV sensitive cones in animals  
846 like the guppy. He suggests that the UV-sensitive cone density is not sufficient to provide a  
847 high-resolution system on its own. The responses of UV cone receptors may have to be  
848 pooled with the results of other types of cones in order to provide a higher order integrated



849 sensory “image” at the level of the brain. While he then argues against his own suggestion,  
850 it may be worth reconsidering.

851 A final point should be re-emphasized. Although there are numerous pigmented cells in  
852 the direct light pathway from the cornea to the retina, and these cells are expected to filter  
853 out considerable amounts of UV light, especially UVB, these cells do not prevent sufficient  
854 UVA from reaching the retina and stimulating the UV cones therein.

855

## 856 **Photo Imaging**

857 Photos by the senior author were taken with a Fujifilm FinePix HS25EXR; settings Macro,  
858 AF: center, Auto Focus: continuous, varying Exposure Compensation, Image Size 16:9,  
859 Image Quality: Fine, ISO: 200, Film Simulation: Astia/Soft, White Balance: 0, Tone: STD,  
860 Dynamic Range: 200, Sharpness: STD, Noise Reduction: High, Intelligent Sharpness: On.  
861 Lens: Fujinon 30x Optical Zoom. Flash: External mounted EF-42 Slave Flash; settings at  
862 EV: 0.0, 35mm, PR1/1, Flash: -2/3. Photos cropped or brightness adjusted when needed  
863 with Microsoft Office 2010 Picture Manager and Adobe Photoshop CS5. All photos by the  
864 senior author.

865

## 866 **Microscopy**

867 All Digital Image processing by conventional bright and dark field equipment. AmScope  
868 M158C. Camera(s): 1. MD35, Resolution: 0.3MP 2. MD200, Resolution: 2MP USB Digital,  
869 Sensor: Aptina (Color), Sensor Type: CMOS. Software: AmScope for Windows. An  
870 attempt was made to restrict ambient light during both daytime and nighttime imaging of  
871 specimens. Imaging was performed with reflected or transmitted practical light sources as  
872 indicated. Where delineation in results warranted, a series of three photos from each  
873 location were taken and presented in the results; reflected (top light only), transmitted  
874 (bottom light only), combined reflected + transmitted (top and bottom light).

875 For purposes of this study low resolution photos were often preferred over higher  
876 resolution for clarity at settings of 40X, 100X or 400X. No images were stained. As  
877 identified, individual images are full body (non-dissected), or manually de-fleshed  
878 (dissected) skin samples. Samples were air dried for minimal time periods of less than one  
879 hour for aid in dissection. All samples and images from right side of body, unless  
880 otherwise noted. No cover glass was utilized, to reduce damage to chromatophore shape,  
881 structure and positioning. No preservatives were used during imaging, though rehydration  
882 was done as needed for clarity. All photos were by the senior author.

883

## 884 **Ethics Statement**

885 This study adhered to established ethical practices under AVMA Guidelines for the  
886 Euthanasia of Animals: 2013 Edition, S6.2.2 Physical Methods (6).

887 All euthanized specimens were photographed immediately, or as soon as possible, after  
888 temperature reduction (rapid chilling) in water (H<sub>2</sub>O) at temperatures just above freezing  
889 (0°C) to avoid potential damage to tissue and chromatophores, while preserving maximum  
890 expression of motile xantho-erythrophores in Pb and non-Pb specimens. All anesthetized  
891 specimens were photographed immediately after short-term immersion in a mixture of 50%  
892 aged tank water (H<sub>2</sub>O) and 50% carbonated water (H<sub>2</sub>CO<sub>3</sub>).

893 All dried specimens photographed immediately after rehydration in cold water (H<sub>2</sub>O).  
894 Prior euthanasia was by cold water (H<sub>2</sub>O) immersion at temperatures just above freezing (0  
895 °C). MS-222 (Tricaine methanesulfonate) was not used to avoid the potential for reported  
896 damage and/or alterations to chromatophores, in particular melanophores, prior to slide  
897 preparation.

898

## 899 **Competing Interests and Funding**

900 The authors declare that they have no competing interests. Senior author is a member  
901 of the Editorial Board for Poeciliid Research; International Journal of the Bioflux Society, and  
902 requested non-affiliated independent peer review volunteers.

903  
904 The authors received no funding for this work.  
905

## 906 **Notes**

907 This publication is number three (3) of four (4) by Bias and Squire in the study of Purple  
908 Body (*Pb*) in *Poecilia reticulata*:

- 909
- 910 1. The Cellular Expression and Genetics of an Established Polymorphism in *Poecilia*  
911 *reticulata*; "Purple Body, (*Pb*)" is an Autosomal Dominant Gene,
  - 912 2. The Cellular Expression and Genetics of Purple Body (*Pb*) in *Poecilia reticulata*, and its  
913 Interactions with Asian Blau (*Ab*) and Blond (*bb*) under Reflected and Transmitted Light,
  - 914 3. The Cellular Expression and Genetics of Purple Body (*Pb*) in the Ocular Media of the  
915 Guppy *Poecilia reticulata*,
  - 916 4. The Phenotypic Expression of Purple Body (*Pb*) in Domestic Guppy Strains of *Poecilia*  
917 *reticulata*.
- 918

## 919 **Acknowledgements**

920 To my best friend and wife Deana Bias, for her support and persistence over the last  
921 several years in this four part study... To my co-author and dear friend Rick Squire for his  
922 patience as a mentor... To those Domestic Breeders who willingly provided additionally  
923 needed pedigree strains and study populations for completion of this paper...  
924

## 925 **References**

- 926 1. Archer, S. N., Endler, J. A., Lythgoe, J. N., & Partridge, J. C. (1987). Visual pigment  
927 polymorphism in the guppy *Poecilia reticulata*. *Vision research*, 27(8), 1243-1252.
- 928 2. Archer, S. N., & Lythgoe, J. N. (1990). The visual pigment basis for cone polymorphism  
929 in the guppy, *Poecilia reticulata*. *Vision research*, 30(2), 225-233.
- 930 3. Bias, A. S. (2015). Working With Autosomal Genes for Color and Pattern: A Domestic  
931 Guppy Breeder's best friend and often worst nightmare... Presented Sept. 5, 2015 to  
932 attendees of the 18<sup>th</sup> World Guppy Contest held in Tampa, Florida, USA.  
933 [https://www.academia.edu/15488221/Working\\_With\\_Autosomal\\_Genes\\_for\\_Color\\_and](https://www.academia.edu/15488221/Working_With_Autosomal_Genes_for_Color_and_Pattern_A_Domestic_Guppy_Breeders_best_friend_and_often_worst_nightmare)  
934 [Pattern\\_A\\_Domestic\\_Guppy\\_Breeders\\_best\\_friend\\_and\\_often\\_worst\\_nightmare](https://www.academia.edu/15488221/Working_With_Autosomal_Genes_for_Color_and_Pattern_A_Domestic_Guppy_Breeders_best_friend_and_often_worst_nightmare) (last  
935 checked 2.1.17).
- 936 4. Bias, A.S. and Squire, R. D. (2017a, *forthcoming*). The Cellular Expression and Genetics  
937 of an Established Polymorphism in *Poecilia reticulata*; "Purple Body, *Pb*" is an Autosomal  
938 Dominant Gene.
- 939 5. Bias, A.S. and Squire, R. D. (2017b, *forthcoming*). The Cellular Expression and Genetics  
940 of Purple Body (*Pb*) in *Poecilia reticulata*, and its Interactions with Asian Blau (*Ab*) and  
941 Blond (*bb*) under Reflected and Transmitted Light.
- 942 6. Bias, A.S. and Squire, R. D. (2017c, *forthcoming*). The Phenotypic Expression of Purple  
943 Body (*Pb*) in Domestic Guppy Strains of *Poecilia reticulata*.
- 944 7. Douglas, R. H., & McGuigan, C. M. (1989). The spectral transmission of freshwater  
945 teleost ocular media—an interspecific comparison and a guide to potential ultraviolet  
946 sensitivity. *Vision research*, 29(7), 871-879.



- 947 8. Douglas, R. H., & Hawryshyn, C. W. (1990). Behavioural studies of fish vision: an  
948 analysis of visual capabilities. In *The visual system of fish* (pp. 373-418). Springer  
949 Netherlands.
- 950 9. Douglas, R. H., Harper, R. D., & Case, J. F. (1998). The pupil response of a teleost fish,  
951 *Porichthys notatus*: description and comparison to other species. *Vision*  
952 *research*, 38(18), 2697-2710.
- 953 10. Douglas, R. H., & Marshall, N. J. (1999). A review of vertebrate and invertebrate ocular  
954 filters. In *Adaptive mechanisms in the ecology of vision* (pp. 95-162). Springer  
955 Netherlands.
- 956 11. Douglas, R. H., & Jeffery, G. (2014). The spectral transmission of ocular media suggests  
957 ultraviolet sensitivity is widespread among mammals. *Proceedings of the Royal Society*  
958 *of London B: Biological Sciences*, 281(1780), 20132995.
- 959 12. Dunlap, W. C., Williams, D. M., Chalker, B. E., & Banaszak, A. T. (1989). Biochemical  
960 photoadaptation in vision: UV-absorbing pigments in fish eye tissues. *Comparative*  
961 *Biochemistry and Physiology Part B: Comparative Biochemistry*, 93(3), 601-607.
- 962 13. Endler, J. A. (1987). Predation, light intensity and courtship behaviour in *Poecilia*  
963 *reticulata* (Pisces: Poeciliidae). *Animal Behaviour*, 35(5), 1376-1385.
- 964 14. Endler, J. A. (1991). Variation in the appearance of guppy color patterns to guppies and  
965 their predators under different visual conditions. *Vision research*, 31(3), 587-608.
- 966 15. Endler, J. A. (1992). Signals, signal conditions, and the direction of evolution. *The*  
967 *American Naturalist*, 139, S125-S153.
- 968 16. Endler, J. A., Basolo, A., Glowacki, S., & Zerr, J. (2001). Variation in response to  
969 artificial selection for light sensitivity in guppies (*Poecilia reticulata*). *The American*  
970 *Naturalist*, 158(1), 36-48.
- 971 17. Fernald, R. D. (1988). Aquatic adaptations in fish eyes. In *Sensory biology of aquatic*  
972 *animals* (pp. 435-466). Springer New York.
- 973 18. Gagnon, Y. L., Wilby, D., & Temple, S. E. (2016). Losing focus: how lens position and  
974 viewing angle affect the function of multifocal lenses in fishes. *JOSA A*, 33(9), 1901-  
975 1909.
- 976 19. Gibson, R., Burns, J. G., & Rodd, F. H. (2009). Flexibility in the colouration of the  
977 meninx (brain covering) in the guppy (*Poecilia reticulata*): investigations of potential  
978 function. *Canadian Journal of Zoology*, 87(6), 529-536.
- 979 20. Gorlick, D. L. (1976). Dominance hierarchies and factors influencing dominance in the  
980 guppy *Poecilia reticulata* (Peters). *Animal Behaviour*, 24(2), 336-346.
- 981 21. Gouveia, G. R., Trindade, G. S., Nery, L. E. M., & Muelbert, J. H. (2015). UVA and UVB  
982 penetration in the water column of a South West Atlantic warm temperate estuary and  
983 its effects on cells and fish larvae. *Estuaries and coasts*, 38(4), 1147-1162.
- 984 22. Gray, M. P., Smith, R. S., Soules, K. A., John, S. W., & Link, B. A. (2009). The aqueous  
985 humor outflow pathway of zebrafish. *Investigative ophthalmology & visual*  
986 *science*, 50(4), 1515-1521.
- 987 23. Grether, G. F., Hudon, J., & Endler, J. A. (2001). Carotenoid scarcity, synthetic pteridine  
988 pigments and the evolution of sexual coloration in guppies (*Poecilia*  
989 *reticulata*). *Proceedings of the Royal Society of London B: Biological*  
990 *Sciences*, 268(1473), 1245-1253.
- 991 24. Grether, G. F., Kolluru, G. R., Lin, K., Quiroz, M. A., Robertson, G., & Snyder, A. J.  
992 (2008). Maternal effects of carotenoid consumption in guppies (*Poecilia*  
993 *reticulata*). *Functional Ecology*, 22(2), 294-302.
- 994 25. Houde, A. E. (1997). *Sex, color, and mate choice in guppies*. Princeton University Press.
- 995 26. Kemp, D. J., Reznick, D. N., & Grether, G. F. (2008). Ornamental evolution in  
996 Trinidadian guppies (*Poecilia reticulata*): insights from sensory processing-based  
997 analyses of entire colour patterns. *Biological Journal of the Linnean Society*, 95(4), 734-  
998 747.

- 999 27. Kemp, D. J., Reznick, D. N., Grether, G. F., & Endler, J. A. (2009). Predicting the  
1000 direction of ornament evolution in Trinidadian guppies (*Poecilia reticulata*). *Proceedings*  
1001 *of the Royal Society of London B: Biological Sciences*, rspb20091226.
- 1002 28. Kottler, V. A., Koch, I., Flötenmeyer, M., Hashimoto, H., Weigel, D., & Dreyer, C.  
1003 (2014). Multiple pigment cell types contribute to the black, blue, and orange ornaments  
1004 of male guppies (*Poecilia reticulata*). *PLoS one*, 9(1), e85647.
- 1005 29. Kouwenberg, J. H. M., Browman, H. I., Cullen, J. J., Davis, R. F., St-Pierre, J. F., &  
1006 Runge, J. A. (1999). Biological weighting of ultraviolet (280–400 nm) induced mortality  
1007 in marine zooplankton and fish. I. Atlantic cod (*Gadus morhua*) eggs. *Marine*  
1008 *Biology*, 134(2), 269-284.
- 1009 30. Kouwenberg, J. H. M., Browman, H. I., Runge, J. A., Cullen, J. J., Davis, R. F., & St-  
1010 Pierre, J. F. (1999). Biological weighting of ultraviolet (280–400 nm) induced mortality  
1011 in marine zooplankton and fish. II. *Calanus finmarchicus* (Copepoda) eggs. *Marine*  
1012 *Biology*, 134(2), 285-293.
- 1013 31. Kunz, Y. W., & Wise, C. (1977). Regional differences of the argentea and sclera in the  
1014 eye of *Poecilia reticulata* P. (Teleostei: Cyprinodontidae). *Zoomorphologie*, 87(3), 203-  
1015 215.
- 1016 32. Laver, C. R., & Taylor, J. S. (2011). RT-qPCR reveals opsin gene upregulation associated  
1017 with age and sex in guppies (*Poecilia reticulata*)-a species with color-based sexual  
1018 selection and 11 visual-opsin genes. *BMC evolutionary biology*, 11(1), 81.
- 1019 33. Loew, E. R., & McFarland, W. N. (1990). The underwater visual environment. In *The*  
1020 *visual system of fish* (pp. 1-43). Springer Netherlands.
- 1021 34. Magurran, A. E., & Seghers, B. H. (1991). Variation in schooling and aggression  
1022 amongst guppy (*Poecilia reticulata*) populations in Trinidad. *Behaviour*, 118(3), 214-234.
- 1023 35. Martin, F. D., & Hengstebeck, M. F. (1981). Eye colour and aggression in juvenile  
1024 guppies, *Poecilia reticulata* peters (Pisces: Poeciliidae). *Animal Behaviour*, 29(2), 325-  
1025 331.
- 1026 36. McGraw, K. J. (2005). The antioxidant function of many animal pigments: are there  
1027 consistent health benefits of sexually selected colourants?. *Animal Behaviour*, 69(4),  
1028 757-764.
- 1029 37. Miyai, C. A., Sanches, F. H. C., Costa, T. M., Colpo, K. D., Volpato, G. L., & Barreto, R.  
1030 E. (2011). The correlation between subordinate fish eye colour and received attacks: a  
1031 negative social feedback mechanism for the reduction of aggression during the  
1032 formation of dominance hierarchies. *Zoology*, 114(6), 335-339.
- 1033 38. Nelson, P. A., Zamzow, J. P., & Losey, G. S. (2001). Ultraviolet blocking in the ocular  
1034 humors of the teleost fish *Acanthocybium solandri* (Scombridae). *Canadian journal of*  
1035 *zoology*, 79(9), 1714-1718.
- 1036 39. Rennison, D. J., Owens, G. L., Allison, W. T., & Taylor, J. S. (2011). Intra-retinal  
1037 variation of opsin gene expression in the guppy (*Poecilia reticulata*). *Journal of*  
1038 *Experimental Biology*, 214(19), 3248-3254.
- 1039 40. Ringvold, A., Anderssen, E., Jellum, E., Bjerkås, E., Sonerud, G. A., Haaland, P. J., ... &  
1040 Kjønnsen, I. (2003). UV-absorbing compounds in the aqueous humor from aquatic  
1041 mammals and various non-mammalian vertebrates. *Ophthalmic research*, 35(4), 208-  
1042 216.
- 1043 41. Sandkam, B. A., Young, C. M., Breden, F. M. W., Bourne, G. R., & Breden, F. (2015).  
1044 Color vision varies more among populations than among species of live-bearing fish from  
1045 South America. *BMC evolutionary biology*, 15(1), 225.
- 1046 42. Sandkam, B., Young, C. M., & Breden, F. (2015). Beauty in the eyes of the beholders:  
1047 colour vision is tuned to mate preference in the Trinidadian guppy (*Poecilia*  
1048 *reticulata*). *Molecular ecology*, 24(3), 596-609.
- 1049 43. Schmitz, L., & Wainwright, P. C. (2011). Nocturnality constrains morphological and  
1050 functional diversity in the eyes of reef fishes. *BMC evolutionary biology*, 11(1), 338.
- 1051 44. Shcherbakov, D., Knörzer, A., Espenhahn, S., Hilbig, R., Haas, U., & Blum, M. (2013).



- 1052 Sensitivity differences in fish offer near-infrared vision as an adaptable evolutionary  
1053 trait. *PLoS one*, 8(5), e64429.
- 1054 45. Siebeck, U. E., & Marshall, N. J. (2001). Ocular media transmission of coral reef fish—  
1055 can coral reef fish see ultraviolet light?. *Vision research*, 41(2), 133-149.
- 1056 46. Smith, E. J., Partridge, J. C., Parsons, K. N., White, E. M., Cuthill, I. C., Bennett, A. T., &  
1057 Church, S. C. (2002). Ultraviolet vision and mate choice in the guppy (*Poecilia*  
1058 *reticulata*). *Behavioral Ecology*, 13(1), 11-19.
- 1059 47. Snip, R. C., Green, W. R., Kreutzer, E. W., Hirst, L. W., & Kenyon, K. R. (1981).  
1060 Posterior corneal pigmentation and fibrous proliferation by iris melanocytes. *Archives of*  
1061 *Ophthalmology*, 99(7), 1232-1238.
- 1062 48. Soules, K. A., & Link, B. A. (2005). Morphogenesis of the anterior segment in the  
1063 zebrafish eye. *BMC developmental biology*, 5(1), 12.
- 1064 49. Svensson, P. A., & Wong, B. B. M. (2011). Carotenoid-based signals in behavioural  
1065 ecology: a review. *Behaviour*, 148(2), 131-189.
- 1066 50. Thorpe, A., Douglas, R. H., & Truscott, R. J. W. (1993). Spectral transmission and short-  
1067 wave absorbing pigments in the fish lens—I. Phylogenetic distribution and  
1068 identity. *Vision research*, 33(3), 289-300.
- 1069 51. Thorpe, A., & Douglas, R. H. (1993). Spectral transmission and short-wave absorbing  
1070 pigments in the fish lens—II. Effects of age. *Vision research*, 33(3), 301-307.
- 1071 52. Tové, M. J. (1995). Ultra-violet photoreceptors in the animal kingdom: their distribution  
1072 and function. *Trends in Ecology & Evolution*, 10(11), 455-460.
- 1073 53. Ward, M. N., Churcher, A. M., Dick, K. J., Laver, C. R., Owens, G. L., Polack, M. D., ... &  
1074 Taylor, J. S. (2008). The molecular basis of color vision in colorful fish: four long wave-  
1075 sensitive (LWS) opsins in guppies (*Poecilia reticulata*) are defined by amino acid  
1076 substitutions at key functional sites. *BMC Evolutionary Biology*, 8(1), 210.
- 1077 54. Watson, C. T., Gray, S. M., Hoffmann, M., Lubieniecki, K. P., Joy, J. B., Sandkam, B. A.,  
1078 ... & Breden, F. (2010). Gene duplication and divergence of long wavelength-sensitive  
1079 opsin genes in the guppy, *Poecilia reticulata*. *Journal of molecular evolution*, 72(2), 240-  
1080 252.
- 1081 55. Weadick, C. J., & Chang, B. S. (2007). Long-wavelength sensitive visual pigments of the  
1082 guppy (*Poecilia reticulata*): six opsins expressed in a single individual. *BMC Evolutionary*  
1083 *Biology*, 7(1), S11.
- 1084 56. Weadick, C. J., Loew, E. R., Rodd, F. H., & Chang, B. S. (2012). Visual pigment  
1085 molecular evolution in the Trinidadian pike cichlid (*Crenicichla frenata*): a less colorful  
1086 world for Neotropical cichlids?. *Molecular biology and evolution*, 29(10), 3045-3060.
- 1087 57. White, E. M., Partridge, J. C., & Church, S. C. (2003). Ultraviolet dermal reflexion and  
1088 mate choice in the guppy, *Poecilia reticulata*. *Animal Behaviour*, 65(4), 693-700.
- 1089 58. Zagarese, H. E., & Williamson, C. E. (2001). The implications of solar UV radiation  
1090 exposure for fish and fisheries. *Fish and Fisheries*, 2(3), 250-260.
- 1091 59. Tové M. J. (1995). Ultra-violet photoreceptors in the animal kingdom: their distribution  
1092 and function. *TREE*, 10(11):455-460.
- 1093 60. Lever C.R.J. & Taylor J.S. (2011). RT-qPCR reveals opsin gene upregulation associated  
1094 with age and sex in guppies (*Pocilia reticulata*) – a species with color-based sexual  
1095 selection and 11 visual-opsin genes. *BMC Evolutionary Biology* 11:81-98.

## 1097 **Supporting Information**

1098 S1 Materials; Slide Specimen Photos
